1  
2  
3  
4  
5  
6  
7  
8  
9  
10  
11  
12  
13  
14  
15  
16  
17  
18  
19  
20  
21  
22  
23  
24  
25  
26  
27

A Normative Database of A-Scan Data Using the Heidelberg Spectralis Spectral Domain  
Optical Coherence Tomography Machine

Joos Meyer<sup>1\*¶</sup>; Roshan Karri<sup>2¶</sup>; Helen Danesh-Meyer<sup>3&</sup>; Kate Drummond<sup>4&</sup>; Andrew  
Symons<sup>2&</sup>

<sup>1</sup>Ophthalmology Department, The Royal Melbourne Hospital, 300 Grattan St, Parkville, VIC  
3050, Australia

<sup>2</sup>The Faculty of Medicine, Dentistry and Health Sciences, The University of Melbourne,  
Parkville, VIC 3010, Australia

<sup>3</sup>Faculty of Medical and Health Sciences, The University of Auckland, 85 Park Rd, Grafton,  
Auckland 1023, New Zealand

<sup>4</sup>The Department of Neurosurgery, The Royal Melbourne Hospital, 300 Grattan St, Parkville,  
VIC 3050, Australia

\*Corresponding author:  
Email: [joos.meyer@mh.org.au](mailto:joos.meyer@mh.org.au)

¶These authors contributed equally to this work.

&These authors also contributed equally to this work.

## 28 **Abstract**

### 29 **Purpose**

30 Develop the first normative database of macular and circumpapillary scans with  
31 reference values at the level of the A-scan using the Heidelberg Spectralis Optical Coherence  
32 Tomography (OCT) machine.

### 34 **Methods**

35 This study is a retrospective cross sectional analysis of macular and circumpapillary OCT  
36 scans of healthy individuals. All participants had a full ophthalmic examination, including  
37 best corrected visual acuity, intraocular pressure, biomicroscopy, posterior segment  
38 examination and OCT scan. The volume and thickness of each of the nine Early Treatment  
39 Diabetic Retinopathy zones at the macula were analysed for the total retinal thickness, retinal  
40 nerve fibre layer (RNFL), ganglion cell layer (GCL) and inner plexiform layer (IPL). The  
41 thickness of the circumpapillary RNFL was analysed at the disc. De-identified A-scans were  
42 extracted from the OCT machine as separate tab-separated text file and made available  
43 according to the data sharing statement.

### 44 **Results**

45 Two-hundred eyes from 144 participants were included of which 98 (49%) were female. The  
46 mean age (SD) was 48.52 (17.52). Participants were evenly distributed across four age  
47 groups and represented nine broad ethnic groups in proportions comparable to the local  
48 distribution. All the macular scans were 20° x 20° (5.9 mm x 5.9 mm), with a total scan  
49 density between 12,800 and 49,152 A-scans. The peripapillary scans were all 12° (3.5 mm),  
50 at a scan density of 768 A-scans. The mean retinal, GCL and IPL volumes were significantly  
51 greater in males than females. Age and total retinal volume ( $r = -0.2561$ ), GCL volume ( $-$   
52  $0.2911$ ) and IPL volume ( $-0.3194$ ) were negatively correlated. No significant correlation was  
53 found between the RNFL and age.

### 54 **Conclusion**

55 This study provides a normative database of macular and circumpapillary scans with  
56 reference values at the level of the A-scan using the Heidelberg Spectralis Optical Coherence  
57 Tomography (OCT) machine.

## 58 **Introduction**

59 Optical coherence tomography (OCT) is a non-invasive imaging technology that uses low  
60 coherence interferometry to create two-dimensional cross-sectional imaging of biological  
61 systems.[1] In ophthalmic practice, OCT is used to image and measure the retinal architecture  
62 and changes that occur in disease states. Diseases, such as glaucoma and compressive optic  
63 neuropathy, manifest distinct changes on OCT scans, particularly on the inner retinal layers.  
64 Important OCT measurements for both diseases include the circumpapillary retinal nerve  
65 fibre layer (RNFL), macular RNFL and the macular ganglion cell layer (GCL).[2,3]

66 The Early Treatment Diabetic Retinopathy Study (ETDRS) grid is a standardised pattern of  
67 dividing and measuring the thickness and volume profile of the retina.[4] It was first  
68 introduced in 1980, and is still the primary method of reporting.[5] Since its inception,  
69 additional grid patterns have been developed; however, there is limited flexibility for  
70 clinicians and researchers to explore novel patterns of segmentation within any currently  
71 commercially available software.

72 For the macular, the standard 20° x 20° scan consists of horizontally stacked scan lines to  
73 create a square scan area. Each horizontal line is termed a B-scan, and each of these  
74 comprises a row of equally distanced A-scans. The A-scan represents the most basic unit of  
75 interrogation from which the rest of the scan is generated. The scan density of the Heidelberg  
76 Stratus (Heidelberg Engineering, Heidelberg, Germany) varies between 25,000 and 50,000  
77 A-scans. For the optic disc, the standard circumpapillary scan consists of a 360° radial scan  
78 of 720 A-scans. Extracting the A-scan data enables the exploration of OCT changes that do  
79 not conform to the spatial distribution of the predefined grid patterns.

80 A normative database of scans is needed for comparison to validate changes in disease states.  
81 To the author's knowledge, a normative database that contains both macular and  
82 circumpapillary scans, which includes reference values for each A-scan of the Heidelberg  
83 Stratus, does not currently exist.

84 The purpose of this study is to report the normative values for macular and optic disc scans  
85 within the standard ETDRS grid and at the level of the A-scan. This study aims to help  
86 clinicians and researchers to identify patterns of change that occur outside the standard  
87 segmentation patterns of the retina.

## 88 **Methods**

### 89 **Study Population**

90 This study is a retrospective cross-sectional analysis of 200 normal eyes that had a visual  
91 assessment and an OCT scan. The participants included patients of The Royal Melbourne  
92 Hospital (RMH) who were found to have no ocular pathology or systemic disease that could  
93 manifest in retinal changes. The RMH database was used to create this normative database.

94 Approximately 50,000 eyes have been scanned since 2012 on the Heidelberg Spectralis  
95 machine at The RMH. The database was queried for normal OCT scans, and the potential  
96 participant's medical records were checked against inclusion and exclusion criteria. All of the  
97 participants had a full ophthalmic examination, including their Snellen best corrected visual  
98 acuity (BCVA), intraocular pressure (IOP), biomicroscopy, posterior segment examination  
99 and OCT scan. The participant's medical records were examined for any exclusions.

100 The retrospective inclusion criteria included healthy participants, aged 18 to 88, with a  
101 BCVA of 6/12 (20/40) on the Snellen chart measured at 6 m (20 feet), and high quality  
102 macular and peripapillary OCT scans (signal strength >15dB). The exclusion criteria  
103 included a history of any: (i) anterior segment disease (except cataracts); (ii) retinal disease;  
104 (iii) glaucoma; (iv) uveitis; (v) optic nerve disease; (vi) systemic disease known to affect the  
105 retina (e.g., diabetes); (vii) neurological disease; (viii) pituitary disease; (ix) intracranial  
106 space-occupying lesions; (x) previous neurosurgery; (xi) retinal lasers; (xii) vitrectomy; (xiii)  
107 topical or systemic anti-vascular endothelial growth factor treatment; (xiv) IOP lowering  
108 medications; (xv) chemotherapy; or (xvi) previous systemic or active topical steroid use. The  
109 excluding biomarkers included peripapillary atrophy, RNFL haemorrhage, optic disc  
110 notching or thinning, age-related macular degeneration (including drusen) or macular disease  
111 on OCT scans. Ethnicity data were collected from the participants and categorised according  
112 to the Australian Bureau of Statistics' (ABS) Australian Standard Classification of Cultural  
113 and Ethnic Groups (ASCCEG).[6]

114 This study was approved by the Human Research and Ethics Committee of The RMH. It was  
115 conducted according to the Declaration of Helsinki in its currently applicable version.

## 116 **Optical Coherence Tomography**

117 All the OCT scans were performed with the Heidelberg Spectralis Spectral Domain (SD)  
118 OCT and the Heidelberg Eye Explorer version 6.7.13.0 (Heidelberg Engineering, Heidelberg,  
119 Germany). All scans were completed by experienced medical imaging personnel at The RMH  
120 medical imaging department; they were performed in a dark room as per the standard hospital  
121 protocol. Only the well-centred scans (>15dB quality) were included in the analysis. The  
122 number of dioptres focus spherical was recorded for each scan as a proxy for the refractive  
123 error. The scans were quality controlled for the accurate segmentation of each macular retinal  
124 inner layer and peripapillary scan, and an experienced grader manually corrected any  
125 aberrations.

126 The macular scans were divided into 1 mm, 3 mm and 6 mm rings on the macular ETDRS  
127 map. The inner ring was defined as the central thickness, and the middle and outer rings were  
128 divided into four zones designated as the superior, nasal, inferior and temporal zones. The  
129 average thickness in each of the nine zones, the macular thickness and the full 360°  
130 peripapillary scans were included in the final analysis.

## 131 **A-Scan Data**

132 The A-scans were extracted from the machine using the Heidelberg Spectralis Layer  
133 Segmentation Export Special Function version 6.0. Each file contained the results from the  
134 automatic retinal layer segmentation algorithm of a Spectralis OCT machine as a  
135 tab-separated text file. The distance values of each A-scan location were represented as  
136 relative coordinates in nanometres from the probe to the layer segmentation interface. The  
137 normative values of the A-scans were compiled as a de-identified single data array per patient,  
138 per eye.

## 139 **Statistical Analysis**

140 All analyses were conducted in the R statistical programming language using RStudio  
141 version 1.3.1073 (Boston, USA).[7] The exploratory data analysis and data visualisation were  
142 performed using the ggplot2 package.[8] The descriptive statistics were reported as the mean,  
143 standard deviation and the first, fifth and 95th percentiles. An independent t-test was used to  
144 compare the thickness values between groups. The correlation between measurements was  
145 found using Pearson correlation coefficients. A multivariate analysis was used to consider the  
146 effects of age and gender; an alpha of 0.05 was considered significant. The chi-square  
147 goodness of fit test was used to compare the observed distribution of ABS ethnicities to the  
148 expected distribution in Melbourne, Australia.

## 149 **Results**

### 150 **Study participants**

151 Two-hundred eyes from 146 participants were included in the final analysis. There were 69  
152 (47%) females and 77 (53%) males, and the mean age (SD) was 48.52 (17.52) (range: 21–85).  
153 Mean (SD) scan focus was 0.29 D (1.96) (range: -6.48–7.86). The participants were evenly  
154 distributed across the age groups (Table 1). Females were slightly under-represented in the  
155 younger age groups and over-represented in the older age groups. This study included 101  
156 (50.5%) right eyes and 99 (49.5%) left eyes. Participants from nine broad ethnicity groups  
157 were included in the study (Table 2). There were significant differences in the proportion of  
158 broad ethnic categories compared to the census population proportions in four out of the nine  
159 groups.

160 **Table 1. Distribution of participants by age group and gender**

| Age group | Participants,<br>n (%) | Eyes,<br>n (%) | Females,<br>n (%) |
|-----------|------------------------|----------------|-------------------|
| 18–33     | 37 (25.3)              | 52 (26.0)      | 14 (37.8)         |
| 34–50     | 41 (28.0)              | 62 (31.0)      | 13 (31.7)         |
| 51–68     | 43 (29.5)              | 57 (28.5)      | 27 (62.8)         |
| 69–88     | 25 (17.1)              | 29 (14.5)      | 15 (60.0)         |

161 **Table 2. Australian Bureau of Statistics Australian Standard Classification of Cultural**  
162 **and Ethnic Groups broad group classification of participants**

| Broad ethnicity category | Participants, Melbourne | P |
|--------------------------|-------------------------|---|
|--------------------------|-------------------------|---|

|                                  | n (%)      | (%)  |        |
|----------------------------------|------------|------|--------|
| North African and Middle Eastern | 15 (7.5)   | 1.9  | <0.001 |
| Northeast Asian                  | 4 (2)      | 5.1  | 0.0644 |
| Northwest European               | 9 (4.5)    | 5.3  | 0.7283 |
| Oceanian                         | 111 (55.5) | 68.5 | <0.001 |
| People of the Americas           | 2 (1)      | 0.8  | 1      |
| Southeast Asian                  | 14 (7)     | 6.0  | 0.644  |
| Southern and Central Asian       | 22 (11)    | 6.9  | 0.031  |
| Southern and Eastern European    | 15 (7.5)   | 4.5  | 0.0666 |
| Sub Saharan African              | 8 (4)      | 1.0  | <0.001 |

## 163 **A-scans**

164 Two-hundred de-identified tab separated text files were exported from the Heidelberg Stratus  
165 SD OCT machine. All the macular scans were 20° x 20° (5.9 mm x 5.9 mm), with 25 to 96  
166 B-scans, and 512 A-scans per B-scan with the automatic real-time mode active. The total  
167 scan density was between 12,800 and 49,152 A-scans. The peripapillary scans were all 12°  
168 (3.5 mm diameter), at a scan density of 768 A-scans. All the scan data are available,  
169 according to the data sharing statement.

## 170 **Distribution of macular and circumpapillary measurements**

171 The mean (SD) total retinal volume was 8.67 mm<sup>3</sup> (0.38) (range: 7.65–9.58). The  
172 macular RNFL volume (SD) was 0.96 mm<sup>3</sup> (0.11) (range: 0.72–1.26). The GCL volume (SD)  
173 was mm<sup>3</sup> 1.09 (0.10) (range: 0.82–1.31) and the inner plexiform layer (IPL) volume (SD)  
174 was 0.89 mm<sup>3</sup> (0.07) (range: 0.7–1.05). See Figs 1 and 2 demonstrating layer measurement  
175 distributions.

176

177 **Fig 1. Histogram and fitted normal distribution curves of macular optical coherence**  
178 **tomography measurements.** (A) Total retinal volume. (B) Retinal nerve fibre layer volume.  
179 (C) Ganglion cell layer volume. (D) Inner plexiform layer volume.

180

181 **Fig 2. Histogram and fitted normal distribution curve of mean peripapillary retinal**  
182 **nerve fibre layer thickness values**

## 183 **Difference in measurements between males and females**

184 The multivariate regression analysis controlling for age and ethnicity (Table 3) showed that  
185 the retinal and GCL volumes were significantly less for females. The total RT was  
186 significantly lower in females in all sectors except for the superior outer sector. The same  
187 was true for the central, nasal inner, temporal inner, inferior inner macular RNFL, GCL and  
188 IPL thicknesses. The GCL and IPL also showed that females had significantly lower superior  
189 inner sectors. There were no significant differences found at the peripapillary RNFL between  
190 males and females (Table 4).

191 **Table 3. Female regression coefficient in multivariate analysis controlling for age with**  
 192 **macular sectorial thickness values as outcome**

| Sector         | Retina     | p   | mRNFL      | p   | GCL        | p   | IPL        | p   |
|----------------|------------|-----|------------|-----|------------|-----|------------|-----|
| Volume         | -0.175751  | *** | -0.0112461 |     | -0.0309332 | *   | -0.0121464 |     |
| Centre         | -14.58119  | *** | -1.287385  | *** | -2.741456  | *** | -2.84705   | *** |
| Nasal inner    | -11.15093  | *** | -0.86165   | *   | -2.44177   | **  | -1.23396   | *   |
| Nasal outer    | -5.82186   | **  | -0.602074  |     | -0.34252   |     | 0.09550    |     |
| Superior inner | -10.07472  | *** | -0.92011   |     | -1.82976   | **  | -1.00703   | *   |
| Superior outer | -2.88614   |     | 0.97539    |     | -0.51977   |     | 0.02971    |     |
| Temporal inner | -10.548601 | *** | -0.503470  | *   | -3.26108   | *** | -1.68946   | **  |
| Temporal outer | -4.83874   | *   | -0.39463   |     | -1.01023   |     | -0.97755   |     |
| Inferior inner | -10.35359  | *** | -1.438830  | **  | -1.97374   | **  | -1.07487   | *   |
| Inferior outer | -4.99137   | *   | -0.33538   |     | -0.37526   |     | -0.13309   |     |

193 P-values are coded as: \*\*\*<0.001, \*\*<0.01 and \*<0.05.

194 **Table 4. Female regression coefficient in multivariate analysis controlling for age with**  
 195 **peripapillary retinal nerve fibre layer sectorial thickness values as outcome**

| Sector            | Disc     | p |
|-------------------|----------|---|
| Total             | -0.58076 |   |
| Nasal superior    | 2.71149  |   |
| Nasal             | -0.18586 |   |
| Nasal inferior    | -0.08341 |   |
| Temporal superior | -2.02026 |   |
| Temporal          | -0.84995 |   |
| Temporal inferior | -2.00331 |   |

196 P-values are coded as: \*\*\*<0.001, \*\*<0.01 and \*<0.05.

### 197 **Decrease in thickness per decade**

198 The mean retinal, GCL and IPL volumes were found to be significantly greater in males than  
 199 females (Table 5). The mean volumes, ETDRS segment thickness values and the first, fifth  
 200 and 95th percentile values were grouped by age for each macular layer (Table 6-9). The mean  
 201 (SD) peripapillary RNFL thickness was 99.7  $\mu$ m (9.47) (range: 78–137). The mean  
 202 peripapillary RNFL thicknesses were grouped by age (Table 10).

203 **Table 5. Mean volumes by gender**

| Volume              | Male           | Female         | P        |
|---------------------|----------------|----------------|----------|
| Retinal             | 8.77 (0.401)   | 8.56 (0.326)   | >0.0001  |
| RNFL                | 0.961 (0.122)  | 0.957 (0.101)  | 0.7943   |
| GCL                 | 1.11 (0.11)    | 1.07 (0.0764)  | 0.002346 |
| IPL                 | 0.903 (0.0801) | 0.879 (0.0622) | 0.01882  |
| Disc RNFL thickness | 99.9 (9.66)    | 99.6 (9.31)    | 0.8      |

204 **Table 6. Macular retinal thickness distribution by age group, showing mean, first, fifth and 95th percentile values for each segment**

| Retina         | 18–33      |       |       |       | 34–50      |       |       |       | 51–68      |       |       |       | 69–88      |       |       |       |
|----------------|------------|-------|-------|-------|------------|-------|-------|-------|------------|-------|-------|-------|------------|-------|-------|-------|
|                | Percentile |       |       |       | Percentile |       |       |       | Percentile |       |       |       | Percentile |       |       |       |
|                | x̄         | 1st   | 5th   | 95th  | x̄         | 1st   | 5th   | 95th  | x̄         | 1st   | 5th   | 95th  | x̄         | 1st   | 5th   | 95th  |
| Volume         | 8.74       | 7.99  | 8.11  | 9.13  | 8.76       | 7.77  | 8.22  | 9.27  | 8.59       | 8.12  | 8.16  | 9.45  | 8.48       | 7.66  | 7.71  | 9.02  |
| Centre         | 270.56     | 228.5 | 239.3 | 306.8 | 280.50     | 228.6 | 246.1 | 308.0 | 279.05     | 220.7 | 237.0 | 320.2 | 270.17     | 233.0 | 240.0 | 305.4 |
| Nasal inner    | 348.29     | 321.0 | 327.0 | 369.7 | 353.31     | 314.0 | 329.0 | 378.0 | 345.77     | 319.7 | 324.2 | 379.2 | 342.45     | 315.6 | 317.4 | 371.6 |
| Nasal outer    | 321.37     | 294.6 | 298.1 | 341.9 | 319.76     | 280.4 | 298.1 | 338.0 | 312.86     | 283.0 | 293.6 | 343.6 | 308.34     | 278.6 | 280.0 | 333.6 |
| Superior inner | 343.29     | 254.7 | 320.1 | 368.3 | 351.45     | 310.1 | 334.1 | 375.0 | 342.33     | 312.0 | 320.4 | 369.2 | 339.69     | 308.6 | 311.2 | 365.8 |
| Superior outer | 302.37     | 272.0 | 276.7 | 321.8 | 301.40     | 269.5 | 285.0 | 320.0 | 296.14     | 273.7 | 278.8 | 322.6 | 291.38     | 259.1 | 262.8 | 310.6 |
| Temporal inner | 329.56     | 300.0 | 305.1 | 352.9 | 337.15     | 295.6 | 318.0 | 360.9 | 330.67     | 302.2 | 304.8 | 362.6 | 327.41     | 299.1 | 302.0 | 346.2 |
| Temporal outer | 286.73     | 257.5 | 267.1 | 300.5 | 286.18     | 251.7 | 263.1 | 304.0 | 282.26     | 263.0 | 265.8 | 315.0 | 278.62     | 244.1 | 247.8 | 299.2 |
| Inferior inner | 343.35     | 315.1 | 320.2 | 362.9 | 347.48     | 309.6 | 328.0 | 370.9 | 339.61     | 316.0 | 316.8 | 371.0 | 338.31     | 309.4 | 314.2 | 361.2 |
| Inferior outer | 292.69     | 258.1 | 266.1 | 309.4 | 291.69     | 266.8 | 272.0 | 308.0 | 286.37     | 264.1 | 268.4 | 314.2 | 282.48     | 253.3 | 255.6 | 303.2 |

205 **Table 7. Macular retinal nerve fibre layer thickness distribution by age group, showing mean, first, fifth and 95th percentile values for**  
206 **each segment**

| RNFL           | 18–33      |      |      |      | 34–50      |      |      |      | 51–68      |      |      |      | 69–88      |      |      |      |
|----------------|------------|------|------|------|------------|------|------|------|------------|------|------|------|------------|------|------|------|
|                | Percentile |      |      |      | Percentile |      |      |      | Percentile |      |      |      | Percentile |      |      |      |
|                | x̄         | 1st  | 5th  | 95th | x̄         | 1st  | 5th  | 95th | x̄         | 1st  | 5th  | 95th | x̄         | 1st  | 5th  | 95th |
| Volume         | 0.95       | 0.77 | 0.81 | 1.12 | 0.96       | 0.74 | 0.76 | 1.16 | 0.94       | 0.75 | 0.78 | 1.11 | 1.01       | 0.79 | 0.88 | 1.16 |
| Centre         | 12.42      | 8.0  | 9.0  | 16.0 | 12.98      | 6.6  | 10.0 | 16.0 | 12.91      | 8.6  | 9.0  | 16.2 | 12.41      | 8.0  | 8.8  | 15.0 |
| Nasal inner    | 22.06      | 17.5 | 19.0 | 26.0 | 22.31      | 17.0 | 18.0 | 27.0 | 21.96      | 17.0 | 18.0 | 27.0 | 22.69      | 18.0 | 18.4 | 28.0 |
| Nasal outer    | 51.73      | 39.0 | 43.0 | 65.0 | 51.44      | 38.0 | 38.0 | 69.9 | 48.79      | 29.1 | 38.8 | 58.8 | 53.24      | 25.5 | 40.6 | 64.0 |
| Superior inner | 25.54      | 19.5 | 21.6 | 31.4 | 26.02      | 19.6 | 20.1 | 32.0 | 25.28      | 19.6 | 20.8 | 31.2 | 27.45      | 20.8 | 23.0 | 35.2 |
| Superior outer | 38.15      | 27.5 | 31.1 | 45.0 | 39.26      | 28.6 | 30.1 | 50.8 | 37.68      | 26.0 | 28.6 | 45.6 | 41.62      | 30.4 | 34.4 | 50.8 |
| Temporal inner | 17.56      | 15.0 | 16.0 | 19.0 | 17.90      | 16.0 | 16.0 | 20.0 | 18.37      | 16.0 | 16.0 | 21.2 | 18.38      | 16.3 | 17.0 | 20.6 |
| Temporal outer | 18.73      | 16.0 | 17.0 | 20.0 | 18.77      | 16.6 | 17.0 | 21.0 | 20.39      | 16.6 | 17.0 | 23.0 | 21.07      | 19.0 | 19.0 | 23.0 |
| Inferior inner | 26.37      | 22.0 | 23.0 | 31.0 | 26.53      | 19.0 | 21.1 | 34.0 | 26.42      | 20.1 | 22.0 | 31.6 | 27.00      | 22.3 | 23.0 | 32.6 |



|                |       |      |      |      |       |      |      |      |       |      |      |      |       |      |      |      |
|----------------|-------|------|------|------|-------|------|------|------|-------|------|------|------|-------|------|------|------|
| Inferior outer | 42.27 | 30.0 | 32.0 | 49.0 | 41.50 | 30.2 | 32.0 | 53.0 | 41.79 | 30.0 | 31.8 | 53.2 | 42.72 | 33.0 | 33.4 | 51.2 |
|----------------|-------|------|------|------|-------|------|------|------|-------|------|------|------|-------|------|------|------|

207 **Table 8. Macular ganglion cell layer thickness distribution by age group, showing mean, first, fifth and 95th percentile values for each**  
 208 **segment**

| GCL            | 18–33      |      |      |      | 34–50      |      |      |      | 51–68      |      |      |      | 69–88      |      |      |      |
|----------------|------------|------|------|------|------------|------|------|------|------------|------|------|------|------------|------|------|------|
|                | Percentile |      |      |      | Percentile |      |      |      | Percentile |      |      |      | Percentile |      |      |      |
|                | x□         | 1st  | 5th  | 95th | x□         | 1st  | 5th  | 95th | x□         | 1st  | 5th  | 95th | x□         | 1st  | 5th  | 95th |
| Volume         | 1.10       | 0.88 | 0.95 | 1.23 | 1.12       | 0.89 | 0.99 | 1.25 | 1.06       | 0.89 | 0.93 | 1.22 | 1.04       | 0.84 | 0.90 | 1.13 |
| Centre         | 16.00      | 9.5  | 10.0 | 24.5 | 16.55      | 7.2  | 10.1 | 23.0 | 15.33      | 8.0  | 8.0  | 21.2 | 14.45      | 8.3  | 9.0  | 22.0 |
| Nasal inner    | 54.10      | 39.1 | 46.7 | 59.9 | 54.69      | 41.2 | 46.0 | 62.0 | 51.32      | 37.5 | 45.0 | 58.2 | 51.79      | 39.4 | 43.4 | 58.0 |
| Nasal outer    | 38.77      | 31.5 | 34.0 | 43.0 | 38.65      | 31.2 | 32.1 | 44.0 | 37.26      | 30.1 | 31.8 | 43.0 | 35.52      | 29.3 | 30.0 | 40.0 |
| Superior inner | 53.96      | 41.1 | 48.0 | 60.5 | 55.08      | 43.2 | 48.1 | 63.0 | 51.49      | 40.1 | 44.0 | 59.0 | 51.79      | 40.7 | 45.0 | 57.0 |
| Superior outer | 35.13      | 28.0 | 30.0 | 41.0 | 35.06      | 28.6 | 29.1 | 39.0 | 33.95      | 29.0 | 29.0 | 40.2 | 32.45      | 27.6 | 29.0 | 36.0 |
| Temporal inner | 47.94      | 30.5 | 38.7 | 56.5 | 50.63      | 38.0 | 40.1 | 58.0 | 46.68      | 34.7 | 39.2 | 54.0 | 47.03      | 33.0 | 38.4 | 54.6 |
| Temporal outer | 36.85      | 25.5 | 30.6 | 44.0 | 37.35      | 29.6 | 30.1 | 44.9 | 34.30      | 28.0 | 29.0 | 40.4 | 34.62      | 27.3 | 28.0 | 40.2 |
| Inferior inner | 53.60      | 42.1 | 47.6 | 60.0 | 54.21      | 43.4 | 47.0 | 63.0 | 50.96      | 42.2 | 44.0 | 58.4 | 51.55      | 40.2 | 46.0 | 57.2 |
| Inferior outer | 33.83      | 28.0 | 28.0 | 38.5 | 33.92      | 25.0 | 26.2 | 38.0 | 32.26      | 26.6 | 27.8 | 36.2 | 32.07      | 26.6 | 28.0 | 36.6 |

209 **Table 9. Macular inner plexiform layer thickness distribution by age group, showing mean, first, fifth and 95th percentile values for**  
 210 **each segment**

| IPL            | 18–33      |      |      |      | 34–50      |      |      |      | 51–68      |      |      |      | 69–88      |      |      |      |
|----------------|------------|------|------|------|------------|------|------|------|------------|------|------|------|------------|------|------|------|
|                | Percentile |      |      |      | Percentile |      |      |      | Percentile |      |      |      | Percentile |      |      |      |
|                | x□         | 1st  | 5th  | 95th | x□         | 1st  | 5th  | 95th | x□         | 1st  | 5th  | 95th | x□         | 1st  | 5th  | 95th |
| Volume         | 0.91       | 0.79 | 0.80 | 1.03 | 0.91       | 0.71 | 0.81 | 0.99 | 0.87       | 0.73 | 0.77 | 1.01 | 0.86       | 0.72 | 0.76 | 0.93 |
| Centre         | 21.15      | 14.0 | 15.0 | 27.9 | 22.24      | 13.6 | 15.1 | 28.0 | 21.53      | 14.6 | 15.8 | 27.2 | 20.90      | 15.3 | 16.0 | 26.0 |
| Nasal inner    | 44.12      | 34.5 | 39.0 | 50.0 | 44.35      | 35.6 | 38.1 | 50.0 | 42.21      | 35.1 | 37.0 | 48.0 | 42.07      | 33.4 | 37.4 | 46.0 |
| Nasal outer    | 29.75      | 24.5 | 25.6 | 34.0 | 29.31      | 22.0 | 24.1 | 33.0 | 28.21      | 22.6 | 23.8 | 33.0 | 26.90      | 22.0 | 22.4 | 30.6 |
| Superior inner | 42.58      | 34.5 | 37.1 | 47.0 | 42.82      | 35.8 | 38.0 | 49.0 | 40.25      | 33.1 | 34.8 | 46.2 | 40.24      | 34.0 | 34.8 | 43.6 |
| Superior outer | 28.87      | 23.5 | 25.0 | 33.0 | 28.10      | 21.6 | 24.0 | 32.0 | 27.28      | 23.0 | 23.8 | 33.0 | 26.38      | 22.3 | 23.4 | 29.6 |
| Temporal inner | 42.17      | 30.6 | 35.6 | 48.5 | 43.16      | 34.6 | 38.0 | 49.0 | 41.16      | 33.7 | 35.8 | 47.2 | 41.07      | 32.1 | 35.8 | 45.0 |

|                |       |      |      |      |       |      |      |      |       |      |      |      |       |      |      |      |
|----------------|-------|------|------|------|-------|------|------|------|-------|------|------|------|-------|------|------|------|
| Temporal outer | 32.52 | 26.5 | 27.6 | 36.5 | 32.44 | 24.2 | 27.0 | 37.0 | 30.77 | 25.0 | 26.8 | 36.2 | 30.79 | 26.3 | 27.0 | 34.6 |
| Inferior inner | 42.46 | 35.0 | 38.0 | 47.5 | 42.35 | 34.6 | 37.0 | 47.0 | 40.00 | 34.1 | 35.8 | 45.0 | 40.69 | 34.6 | 36.0 | 44.6 |
| Inferior outer | 27.44 | 22.0 | 23.0 | 32.0 | 27.29 | 20.0 | 20.2 | 31.0 | 25.91 | 20.6 | 22.0 | 30.0 | 26.10 | 22.3 | 23.0 | 29.6 |

211

212 **Table 10. Retinal nerve fibre layer disc distribution by age group, showing mean, first, fifth and 95th percentile values for each segment**

| Disc              | 18–33      |      |       |       | 34–50      |       |       |       | 51–68      |      |       |       | 69–88      |       |       |       |
|-------------------|------------|------|-------|-------|------------|-------|-------|-------|------------|------|-------|-------|------------|-------|-------|-------|
|                   | Percentile |      |       |       | Percentile |       |       |       | Percentile |      |       |       | Percentile |       |       |       |
|                   | x̄         | 1st  | 5th   | 95th  | x̄         | 1st   | 5th   | 95th  | x̄         | 1st  | 5th   | 95th  | x̄         | 1st   | 5th   | 95th  |
| Total             | 99.96      | 82.5 | 86.1  | 113.5 | 101.34     | 83.6  | 87.0  | 120.8 | 98.42      | 82.0 | 83.8  | 112.0 | 98.55      | 79.7  | 84.8  | 109.2 |
| Nasal superior    | 114.19     | 69.6 | 85.8  | 145.7 | 110.10     | 84.1  | 88.1  | 135.0 | 111.79     | 72.1 | 78.0  | 148.0 | 107.45     | 73.6  | 78.6  | 144.8 |
| Nasal             | 74.90      | 48.5 | 50.6  | 103.3 | 78.39      | 50.8  | 57.0  | 99.9  | 76.02      | 53.7 | 56.8  | 95.0  | 79.79      | 58.1  | 63.4  | 100.8 |
| Nasal inferior    | 111.96     | 61.5 | 71.2  | 149.8 | 115.85     | 70.0  | 79.0  | 152.7 | 112.68     | 75.6 | 81.4  | 157.2 | 112.48     | 77.5  | 84.8  | 153.0 |
| Temporal superior | 139.71     | 99.1 | 115.0 | 164.5 | 143.03     | 115.8 | 120.1 | 171.8 | 133.58     | 93.6 | 106.8 | 156.4 | 132.79     | 103.7 | 108.4 | 152.2 |
| Temporal          | 71.37      | 51.5 | 54.7  | 92.1  | 69.37      | 57.2  | 58.0  | 84.0  | 68.89      | 52.8 | 57.0  | 83.2  | 70.14      | 46.2  | 57.0  | 90.2  |
| Temporal inferior | 141.50     | 91.0 | 119.6 | 166.9 | 145.55     | 117.1 | 120.1 | 183.7 | 139.56     | 89.3 | 111.2 | 173.4 | 135.28     | 115.3 | 116.4 | 149.2 |

213 Linear regression analysis showed a significant negative correlation between the total retinal  
 214 volume and age ( $r = -0.2561$ ), GCL volume and age ( $-0.2911$ ) and IPL volume and age ( $-$   
 215  $0.3194$ ). There was no significant correlation found between the RNFL and age. Figs 3 and 4  
 216 demonstrate trend lines for layer measurements against age. Table 11 demonstrates the  
 217 regression analysis of segmental retinal thickness (RT) values against age. The strongest  
 218 three significant negative associations were found in the superior inner IPL ( $r = -0.3444$ ),  
 219 nasal outer IPL ( $r = -0.3217$ ) and inferior inner IPL ( $r = -0.3179$ ) segments. The only  
 220 significant positively correlated segment was the temporal inner RNFL ( $r = 0.1929$ ). The only  
 221 significant association between age and thickness at the peripapillary disc scan was the  
 222 superior temporal sector ( $r = -0.1910$ ) (Table 12).

223 **Fig 3. Scatter plot with trend line for macular optical coherence tomography**  
 224 **measurements against age.** (A) Total retinal volume. (B) Retinal nerve fibre layer volume.  
 225 (C) Ganglion cell layer volume. (D) Inner plexiform layer volume.

226 **Fig 4. Scatter plot with trend line for mean peripapillary retinal nerve fibre layer**  
 227 **thickness against age**

228 **Table 11. Regression analysis of layer thickness ( $\mu\text{m}$ ) against age (years) and p-value for**  
 229 **each macular segment**

| Segment        | Retina  |         | RNFL    |        | GCL     |         | IPL     |         |
|----------------|---------|---------|---------|--------|---------|---------|---------|---------|
|                | R       | p       | R       | p      | R       | p       | R       | p       |
| Volume         | -0.2561 | 0.0003  | 0.0658  | 0.3544 | -0.2911 | <0.0001 | -0.3194 | <0.0001 |
| Centre         | 0.0089  | 0.9008  | 0.0011  | 0.9875 | -0.1500 | 0.0340  | -0.0585 | 0.4103  |
| Nasal inner    | -0.1821 | 0.0098  | -0.0003 | 0.9969 | -0.2821 | 0.0001  | -0.2930 | <0.0001 |
| Nasal outer    | -0.3151 | <0.0001 | -0.0574 | 0.4191 | -0.3051 | <0.0001 | -0.3217 | <0.0001 |
| Superior inner | -0.1438 | 0.0421  | 0.0572  | 0.4214 | -0.2954 | <0.0001 | -0.3444 | <0.0001 |
| Superior outer | -0.2466 | 0.0004  | 0.0964  | 0.1743 | -0.2494 | 0.0004  | -0.2873 | <0.0001 |
| Temporal inner | -0.1117 | 0.1152  | 0.1929  | 0.0062 | -0.1847 | 0.0088  | -0.2071 | 0.0033  |
| Temporal outer | -0.1943 | 0.0058  | <0.0001 | 0.3556 | -0.2516 | 0.0003  | -0.2001 | 0.0045  |
| Inferior inner | -0.0532 | 0.4540  | <0.0001 | 0.9996 | -0.2841 | <0.0001 | -0.3179 | <0.0001 |
| Inferior outer | -0.2521 | 0.0003  | 0.0033  | 0.9627 | -0.2233 | 0.0015  | -0.2138 | 0.0024  |

230 **Table 12. Regression analysis of layer thickness ( $\mu\text{m}$ ) against age (years) and p-value for**  
 231 **each disc segment**

| Segment           | Disc    |        |
|-------------------|---------|--------|
|                   | R       | p      |
| Total             | -0.1050 | 0.139  |
| Nasal superior    | -0.1298 | 0.0671 |
| Nasal             | 0.0654  | 0.3573 |
| Nasal inferior    | -0.0255 | 0.72   |
| Temporal superior | -0.1910 | 0.0067 |
| Temporal          | -0.0533 | 0.4539 |
| Temporal inferior | -0.1312 | 0.0642 |

233 **Association between refractive error and thickness**

234 Retinal thickness segments, except for the nasal outer, were not significantly  
 235 correlated with refractive error. In order of magnitude, nasal outer ( $r = -0.2020$ ), inferior  
 236 outer ( $r = -0.1570$ ) and inferior inner ( $r = -0.1314$ ) RNFL segments were negatively  
 237 correlated. Central RNFL was positively correlated ( $r = 0.1426$ ). GCL segments were only  
 238 negatively correlated; superior inner ( $r = -0.2034$ ), nasal inner ( $r = -0.1782$ ), temporal inner ( $r$   
 239  $= -0.1534$ ) and nasal outer ( $r = -0.1478$ ). The IPL had the most segments significantly  
 240 correlated with refractive error all of which were negative and included IPL volume ( $r =$   
 241  $0.1668$ ), nasal inner ( $r = -0.2154$ ), nasal outer ( $r = -0.1946$ ), superior inner ( $r = -0.2205$ ),  
 242 temporal inner ( $r = -0.1755$ ), and inferior inner ( $r = -0.2448$ ) (Table 13). Nasal ( $r = 0.1863$ )  
 243 and nasal inferior ( $r = 0.1924$ ) disc segments were significantly positively correlated while  
 244 the temporal sector was negatively correlated ( $r = -0.2365$ ).

245 **Table 13. Regression analysis of layer thickness ( $\mu\text{m}$ ) against refractive error (dioptries)**  
 246 **and p-value for each macular segment**

| Segment        | Retina  |        | RNFL    |        | GCL     |        | IPL     |        |
|----------------|---------|--------|---------|--------|---------|--------|---------|--------|
|                | R       | p      | R       | p      | R       | p      | R       | p      |
| Volume         | -0.0877 | 0.2171 | -0.1290 | 0.0687 | -0.1138 | 0.1088 | -0.1668 | 0.0182 |
| Centre         | 0.0942  | 0.1847 | 0.1426  | 0.044  | -0.0509 | 0.4744 | 0.0341  | 0.632  |
| Nasal inner    | -0.0475 | 0.5041 | -0.0751 | 0.2905 | -0.1782 | 0.0116 | -0.2154 | 0.0022 |
| Nasal outer    | -0.1614 | 0.0225 | -0.2020 | 0.0041 | -0.1478 | 0.0374 | -0.1946 | 0.0058 |
| Superior inner | -0.0205 | 0.7733 | -0.0769 | 0.2794 | -0.2034 | 0.0039 | -0.2205 | 0.0017 |
| Superior outer | -0.0460 | 0.5178 | -0.0228 | 0.7482 | -0.0193 | 0.7857 | -0.0822 | 0.2473 |
| Temporal inner | -0.0339 | 0.6332 | 0.0723  | 0.3089 | -0.1534 | 0.0301 | -0.1755 | 0.0529 |
| Temporal outer | -0.0413 | 0.5616 | 0.1210  | 0.2555 | -0.0638 | 0.3695 | -0.1073 | 0.1306 |
| Inferior inner | -0.1129 | 0.1113 | -0.1314 | 0.0637 | -0.2102 | 0.3695 | -0.2448 | 0.0005 |
| Inferior outer | -0.1045 | 0.1407 | -0.1570 | 0.0264 | -0.0268 | 0.7065 | -0.0390 | 0.5828 |

253

254 **Table 14. Regression analysis of layer thickness ( $\mu\text{m}$ ) against refractive error (dioptries)**  
 255 **and p-value for each disc segment**

| Segment           | Disc    |        |
|-------------------|---------|--------|
|                   | R       | p      |
| Total             | 0.0899  | 0.2056 |
| Nasal superior    | 0.0383  | 0.5903 |
| Nasal             | 0.1863  | 0.0083 |
| Nasal inferior    | 0.1924  | 0.0063 |
| Temporal superior | -0.0722 | 0.3096 |
| Temporal          | -0.2365 | 0.0007 |
| Temporal inferior | 0.1029  | 0.1472 |

260

## 261 Discussion and Conclusion

262 SD OCT has revolutionised the diagnostic and prognostic capabilities for a number of  
263 ophthalmic conditions, including diabetic macular oedema, glaucoma, age-related macular  
264 degeneration and compressive optic neuropathy.[9,10] Normative databases provide the  
265 reference values against which to compare cases of disease states. Although several studies  
266 report the normative data for SD OCT,[11–13] to the author’s knowledge, no data exist for  
267 SD OCT that includes both macular GCL and peripapillary RNFL scans at the A-scan level.  
268 The A-scan is a single point of interrogation on the retina that represents the most basic unit  
269 of measurement data in the OCT. Equivalent A-scans represent the same anatomical location  
270 across patients. The comparison of A-scan measurements between patients is a more precise  
271 analysis than the standard ETDRS grid, which is based on averaged A-scan values across the  
272 segments. In the advent of analytical methodologies, such as artificial intelligence and  
273 machine learning, it is becoming increasingly possible to use larger volumes of data. The  
274 primary purpose of reporting normative A-scans is to facilitate further research into patterns  
275 of disease development at the retina beyond the confines of standardised grids, such as  
276 ETDRS, using such methodologies.

277 In the creation of a normative database, inclusion and exclusion criteria must be carefully  
278 considered to realistically represent the distribution of normal and diseased populations of  
279 interest. This study aimed to create a normative dataset of OCT scans for ongoing research of  
280 glaucoma and compressive optic neuropathies within the metropolitan region of Melbourne,  
281 Australia. An ethnically diverse population was used to represent the target population. All  
282 nine of the broad ethnic groups present in Australia were represented in our study population  
283 in similar proportions.

284 Five groups showed no statistical difference compared to the known proportions in  
285 Melbourne. Given the small sample size and large number of ethnic groups, the database was  
286 representative of the target population. The ethnic groups used in this study were extracted  
287 from population census data that were designed according to political and geographical  
288 boundaries. This may have caused the grouping of some participants with differing genetic  
289 influences on their retinal structure. For example, the Americas ethnic group included both  
290 African American and Caucasian American people that have been shown to have different  
291 OCT measurements.[14,15] This was an unavoidable limitation set by the Australian census  
292 groups.[16]

293 This study found a negative association between age and macular thickness, which has been  
294 previously demonstrated. All the sectors of the ETDRS grid have been reported to be  
295 negatively associated with increasing age, except for the central 1 mm of the retina.[12,17–  
296 19] This study is consistent with these findings; however, the negative correlation found in  
297 the temporal inner and inferior inner segments was found not to be statistically significant.  
298 Similar to other studies, the central area had almost no association ( $r = 0.00899$ ,  $p = 0.9008$ ).  
299 This study identified that the GCL and IPL thickness and volume for all the sectors  
300 (excluding the centre for the IPL) decreased with age. This was in keeping with findings from

301 previous studies.[12,17] This finding represents a normal process of ageing with loss of  
302 RNFLs over time, which has been reported to be between 0.3% and 0.6% of neurons lost per  
303 year.[20] This is important for differentiating losses due to age-related processes from those  
304 caused by disease processes, such as glaucoma or compressive optic neuropathy.

305 A statistically significant positive correlation was found between increasing age and temporal  
306 inner RNFL thickness ( $r = 0.1929$ ,  $p = 0.0062$ ). Similarly, Nieves-Moreno et al. found a  
307 positive correlation between temporal inner RNFL and age ( $r = 0.256$ ,  $p = <0.001$ ).<sup>11</sup> No  
308 other significant correlations were found between RNFL volume or thickness and age in this  
309 study. Given that the temporal inner is the thinnest RNFL sector, this study postulated that it  
310 would be proportionally the most affected by an increasing thickness observed in the internal  
311 limiting membrane with age and, therefore, correlate positively with age. Males were found  
312 to have a significantly higher RT, RNFL, GCL and IPL thickness than females. This was  
313 most evident in the inner layers, which is similar to the OCT results reported in other  
314 studies.[12,17]

315 The Limitations of this study include its retrospective design, which led to missing variables  
316 that may have affected the OCT measurements, including the axial length and refraction. This  
317 study provides normal baseline data for the comparison of various macular diseases. These  
318 data will also be used to monitor patients with glaucoma and compressive optic neuropathy at  
319 The RMH.

## 320 **Acknowledgements**

321 Amanda Rebbechi – medial photographer; Joss Dimock – medical photographer, Debbie  
322 Curran – medical photographer;

## 323 **References**

324

- 325 1. Huang D, Swanson E, Lin C, Schuman J, Stinson W, Chang W, et al. Optical coherence  
326 tomography. *Science*. 1991;254(5035):1178–81.
- 327 2. Danesh-Meyer HV, Yap J, Frampton C, Savino PJ. Differentiation of Compressive from  
328 Glaucomatous Optic Neuropathy with Spectral-Domain Optical Coherence Tomography.  
329 *Ophthalmology*. 2014;121(8):1516–23.
- 330 3. Huang D, Swanson E, Lin C, Schuman J, Stinson W, Chang W, et al. Optical coherence  
331 tomography. *Science*. 1991;254(5035):1178–81.
- 332 4. Group ETDRSR. Grading Diabetic Retinopathy from Stereoscopic Color Fundus  
333 Photographs—An Extension of the Modified Airlie House Classification. *Ophthalmology*.  
334 1991;98(5):786–806.
- 335 5. Early photocoagulation for diabetic retinopathy. ETDRS report number 9. Early Treatment  
336 Diabetic Retinopathy Study Research Group. *Ophthalmology*. 1991;98(5 Suppl):766–85.
- 337 6. (ABS) AB of S. Australian Standard Classification of Cultural and Ethnic Groups  
338 (ASCCEG) [Internet]. n.d. Available from:  
339 <https://www.abs.gov.au/ausstats/abs@.nsf/Previousproducts/1249.0Main%20Features12011?>
- 340 7. R Development Core Team: A Language and Environment for Statistical Computing.  
341 Vienna, Austria: R Foundation for Statistical Computing; 2011.
- 342 8. Wickham H. *ggplot2: Elegant Graphics for Data Analysis* [Internet]. Springer-Verlag New  
343 York; 2016. Available from: <https://ggplot2.tidyverse.org>
- 344 9. Danesh-Meyer HV, Wong A, Papchenko T, Matheos K, Stylli S, Nichols A, et al. Optical  
345 coherence tomography predicts visual outcome for pituitary tumors. *J Clin Neurosci*.  
346 2015;22(7):1098–104.
- 347 10. Adhi M, Duker JS. Optical coherence tomography--current and future applications. *Curr*  
348 *Opin Ophthalmol*. 2013;24(3):213–21.
- 349 11. Grover S, Murthy RK, Brar VS, Chalam KV. Normative Data for Macular Thickness by  
350 High-Definition Spectral-Domain Optical Coherence Tomography (Spectralis). *Am J*  
351 *Ophthalmol*. 2009;148(2):266–71.
- 352 12. Nieves-Moreno M, Martínez-de-la-Casa JM, Cifuentes-Canorea P, Sastre-Ibáñez M,  
353 Santos-Bueso E, Sáenz-Francés F, et al. Normative database for separate inner retinal layers

- 354 thickness using spectral domain optical coherence tomography in Caucasian population. Plos  
355 One. 2017;12(7):e0180450.
- 356 13. Appukuttan B, Giridhar A, Gopalakrishnan M, Sivaprasad S. Normative spectral domain  
357 optical coherence tomography data on macular and retinal nerve fiber layer thickness in  
358 Indians. Indian J Ophthalmol. 2014;62(3):316–21.
- 359 14. Kelty PJ, Payne JF, Trivedi RH, Kelty J, Bowie EM, Burger BM. Macular Thickness  
360 Assessment in Healthy Eyes Based on Ethnicity Using Stratus OCT Optical Coherence  
361 Tomography. Investigative Ophthalmology Vis Sci. 2008;49(6):2668.
- 362 15. Kashani AH, Zimmer-Galler IE, Shah SM, Dustin L, Do DV, Elliott D, et al. Retinal  
363 Thickness Analysis by Race, Gender, and Age Using Stratus OCT. Am J Ophthalmol.  
364 2010;149(3):496-502.e1.
- 365 16. Realini T, Zangwill LM, Flanagan JG, Garway-Heath D, Patella VM, Johnson CA, et al.  
366 Normative Databases for Imaging Instrumentation. J Glaucoma. 2015;24(6):480–3.
- 367 17. Demirkaya N, Dijk HW van, Schuppen SM van, Abràmoff MD, Garvin MK, Sonka M, et  
368 al. Effect of Age on Individual Retinal Layer Thickness in Normal Eyes as Measured With  
369 Spectral-Domain Optical Coherence Tomography. Investigative Ophthalmology Vis Sci.  
370 2013;54(7):4934.
- 371 18. Manassakorn A, Chaidaroon W, Ausayakhun S, Aupapong S, Wattananikorn S.  
372 Normative database of retinal nerve fiber layer and macular retinal thickness in a Thai  
373 population. Jpn J Ophthalmol. 2008;52(6):450–6.
- 374 19. Appukuttan B, Giridhar A, Gopalakrishnan M, Sivaprasad S. Normative spectral domain  
375 optical coherence tomography data on macular and retinal nerve fiber layer thickness in  
376 Indians. Indian J Ophthalmol. 2014;62(3):316–21.
- 377 20. Repka MX, Quigley HA. The Effect of Age on Normal Human Optic Nerve Fiver  
378 Number and Diameter. Ophthalmology. 1989;96(1):26–32.
- 379



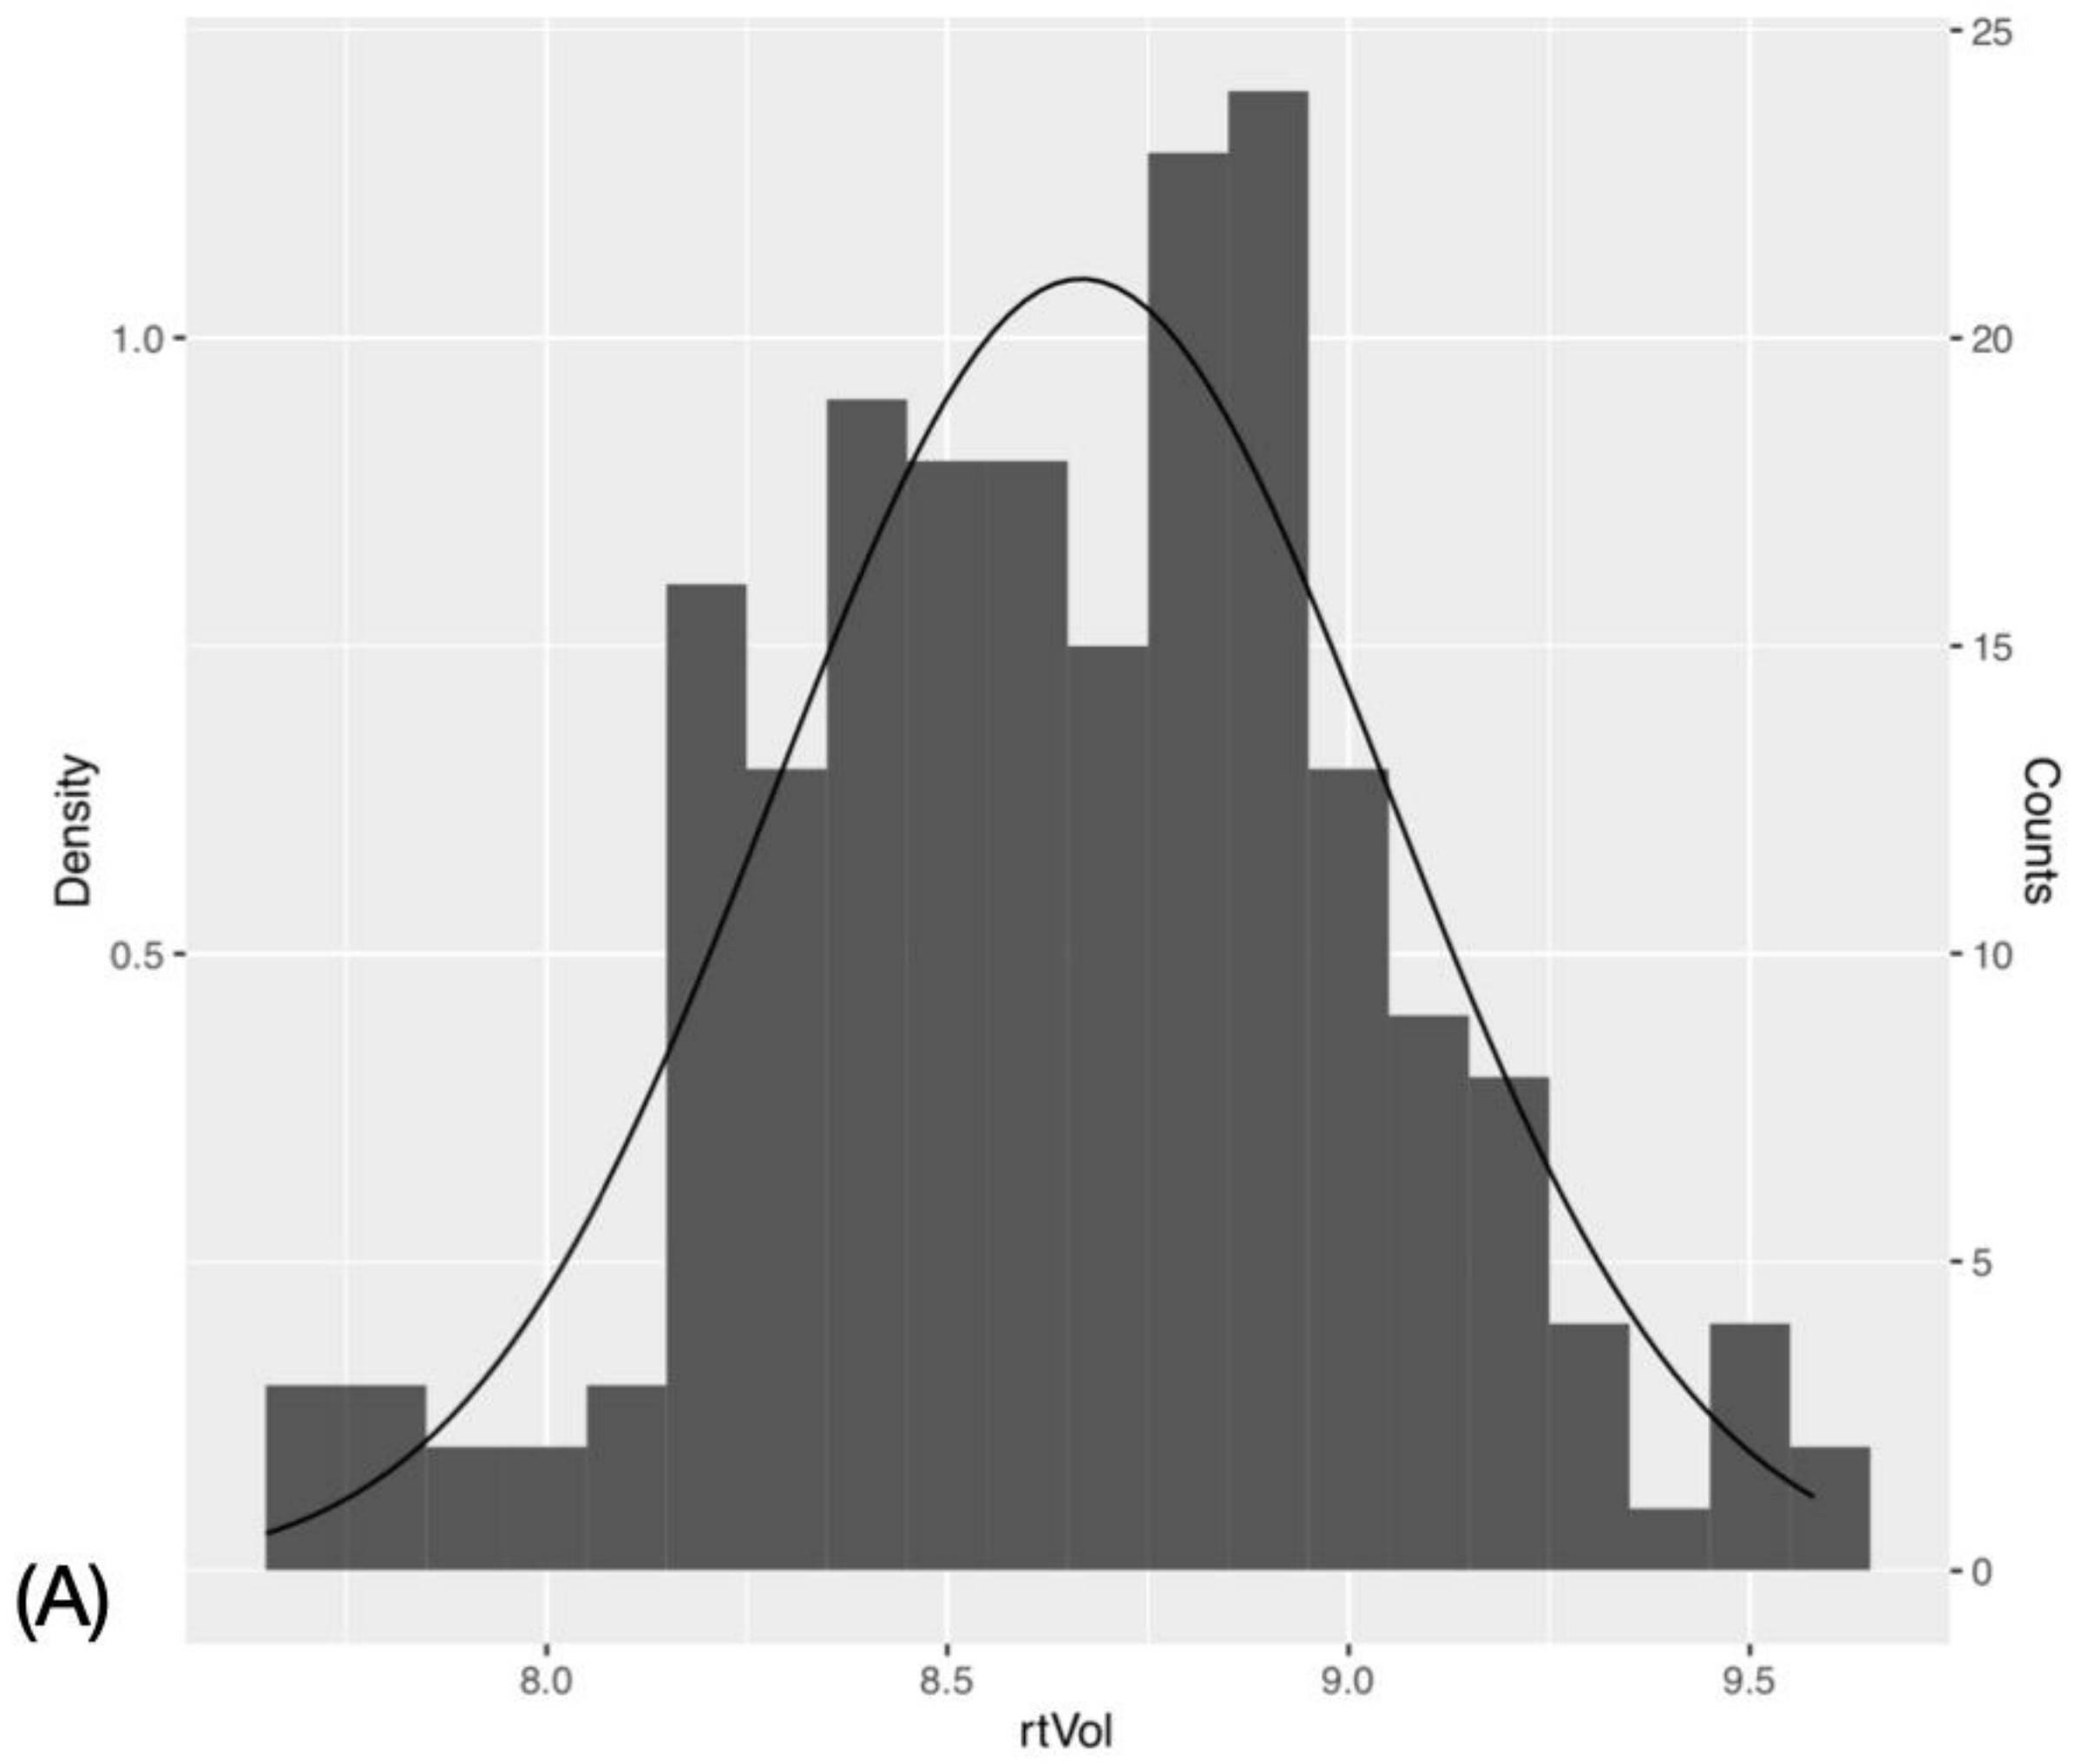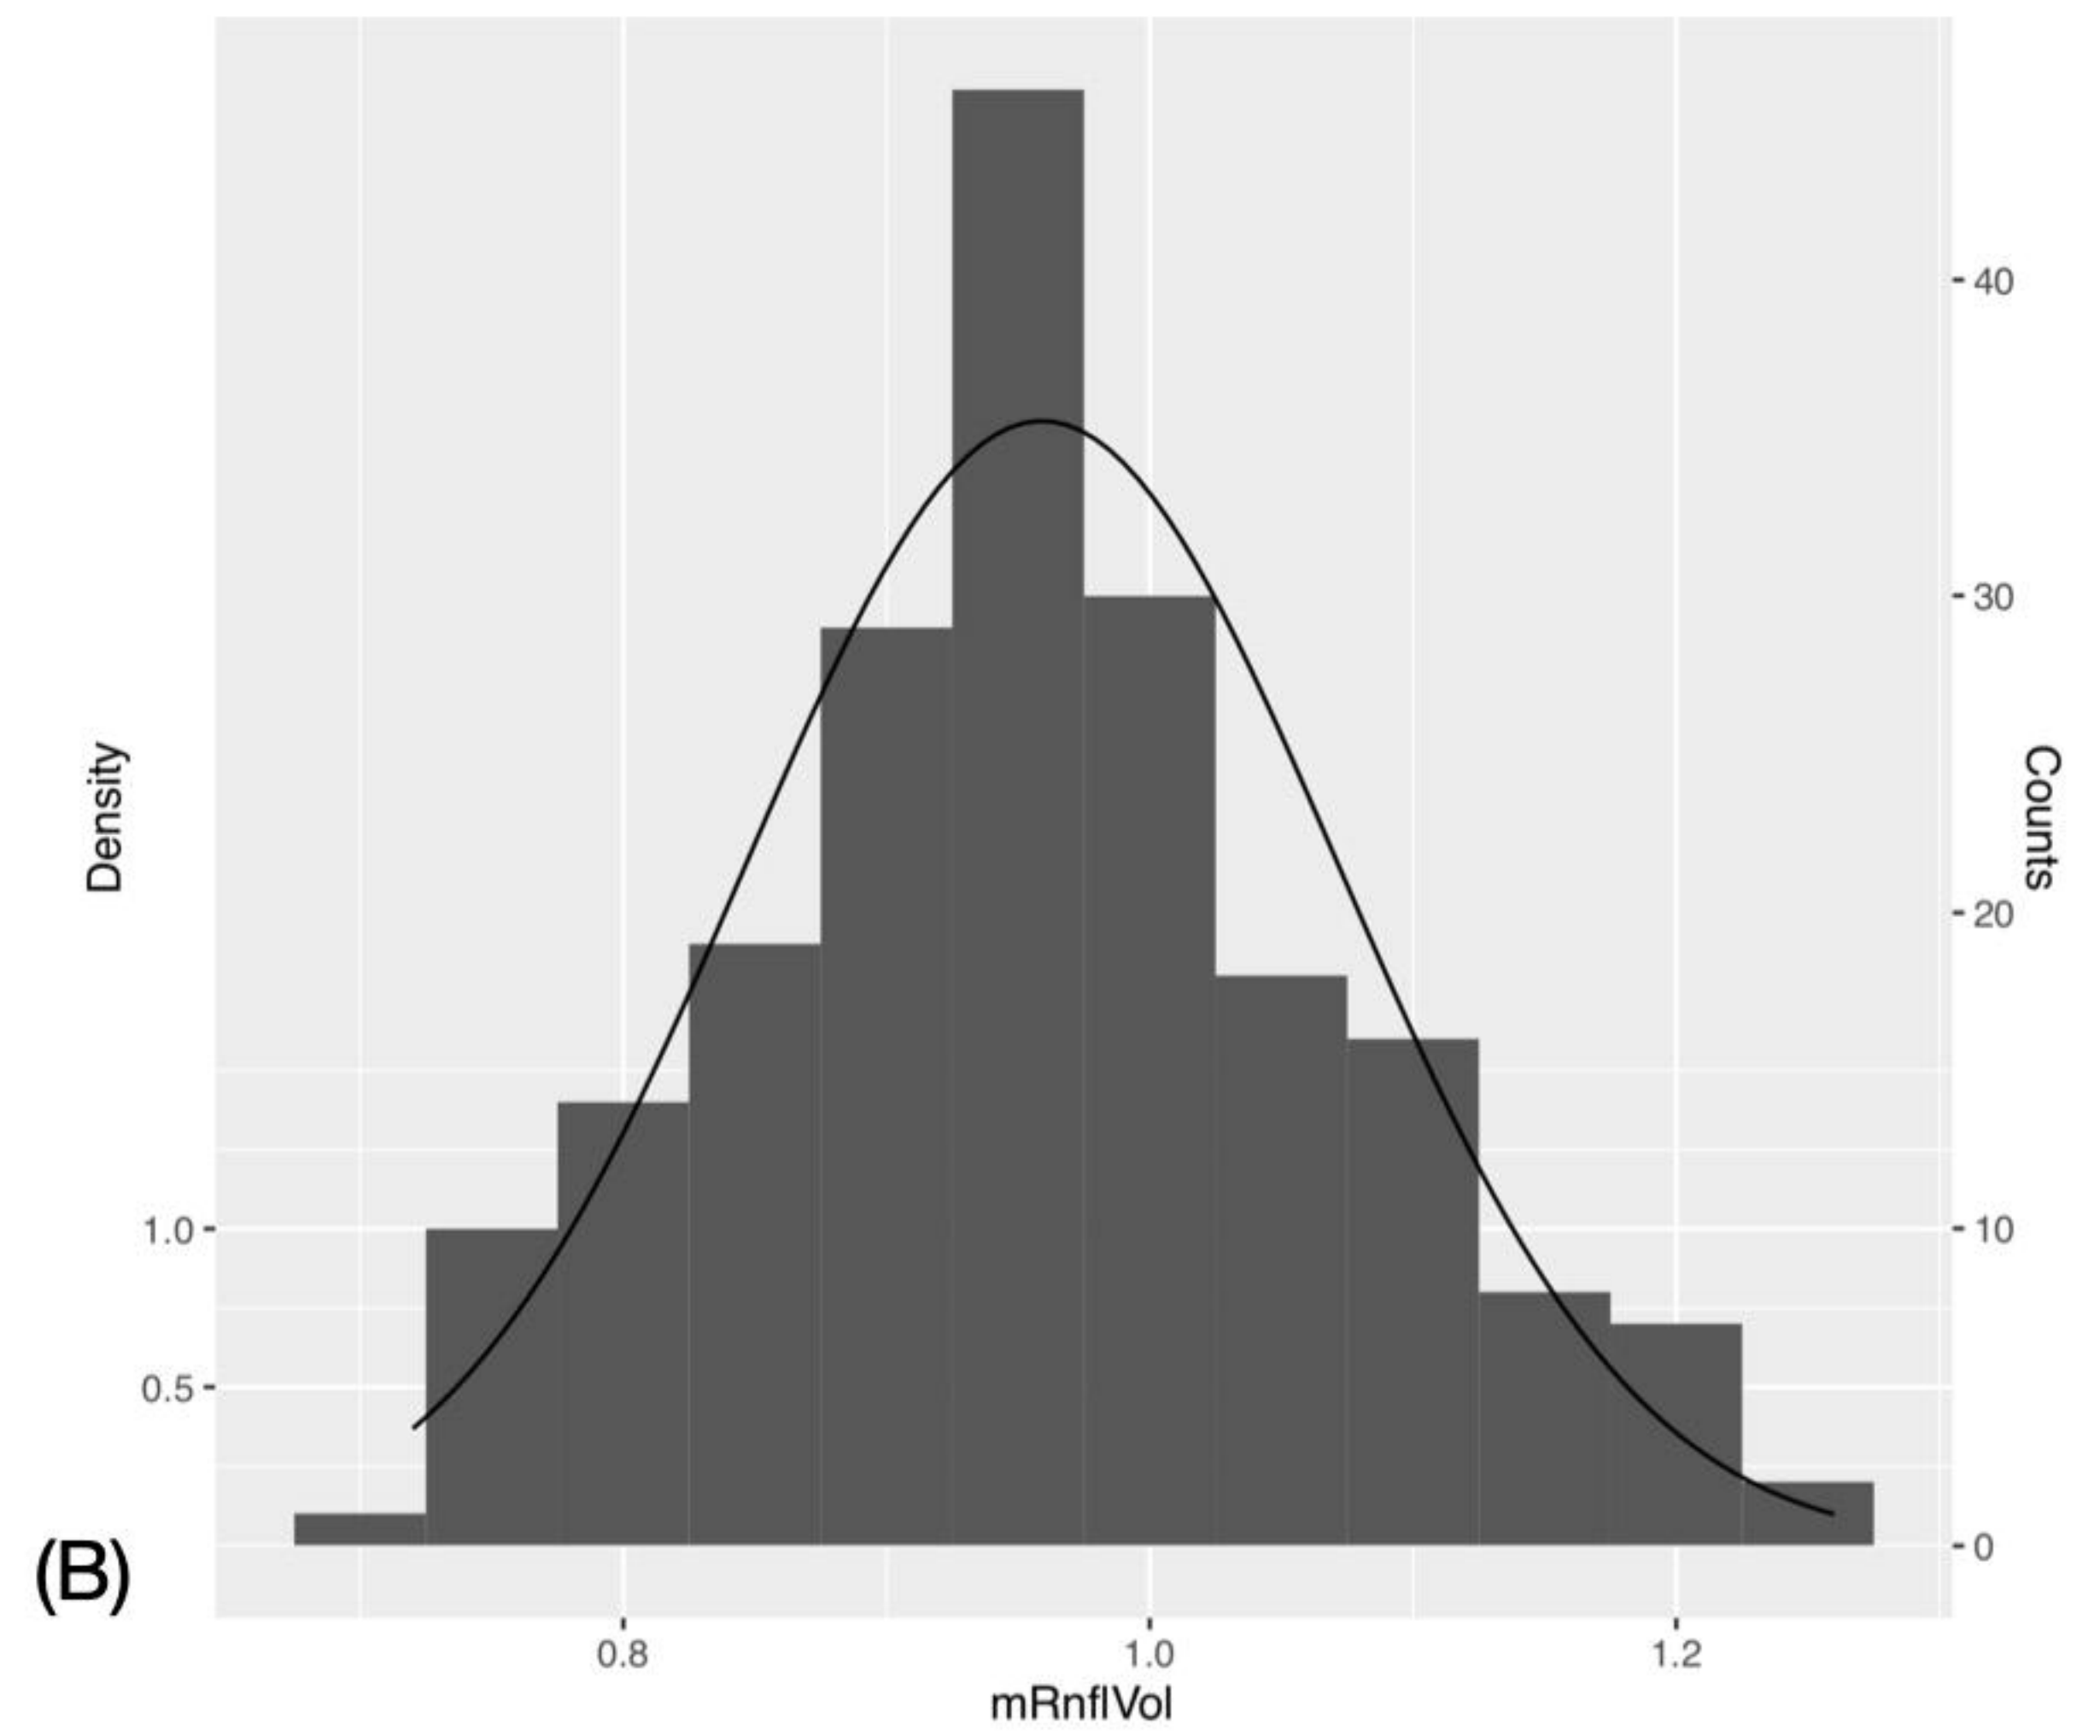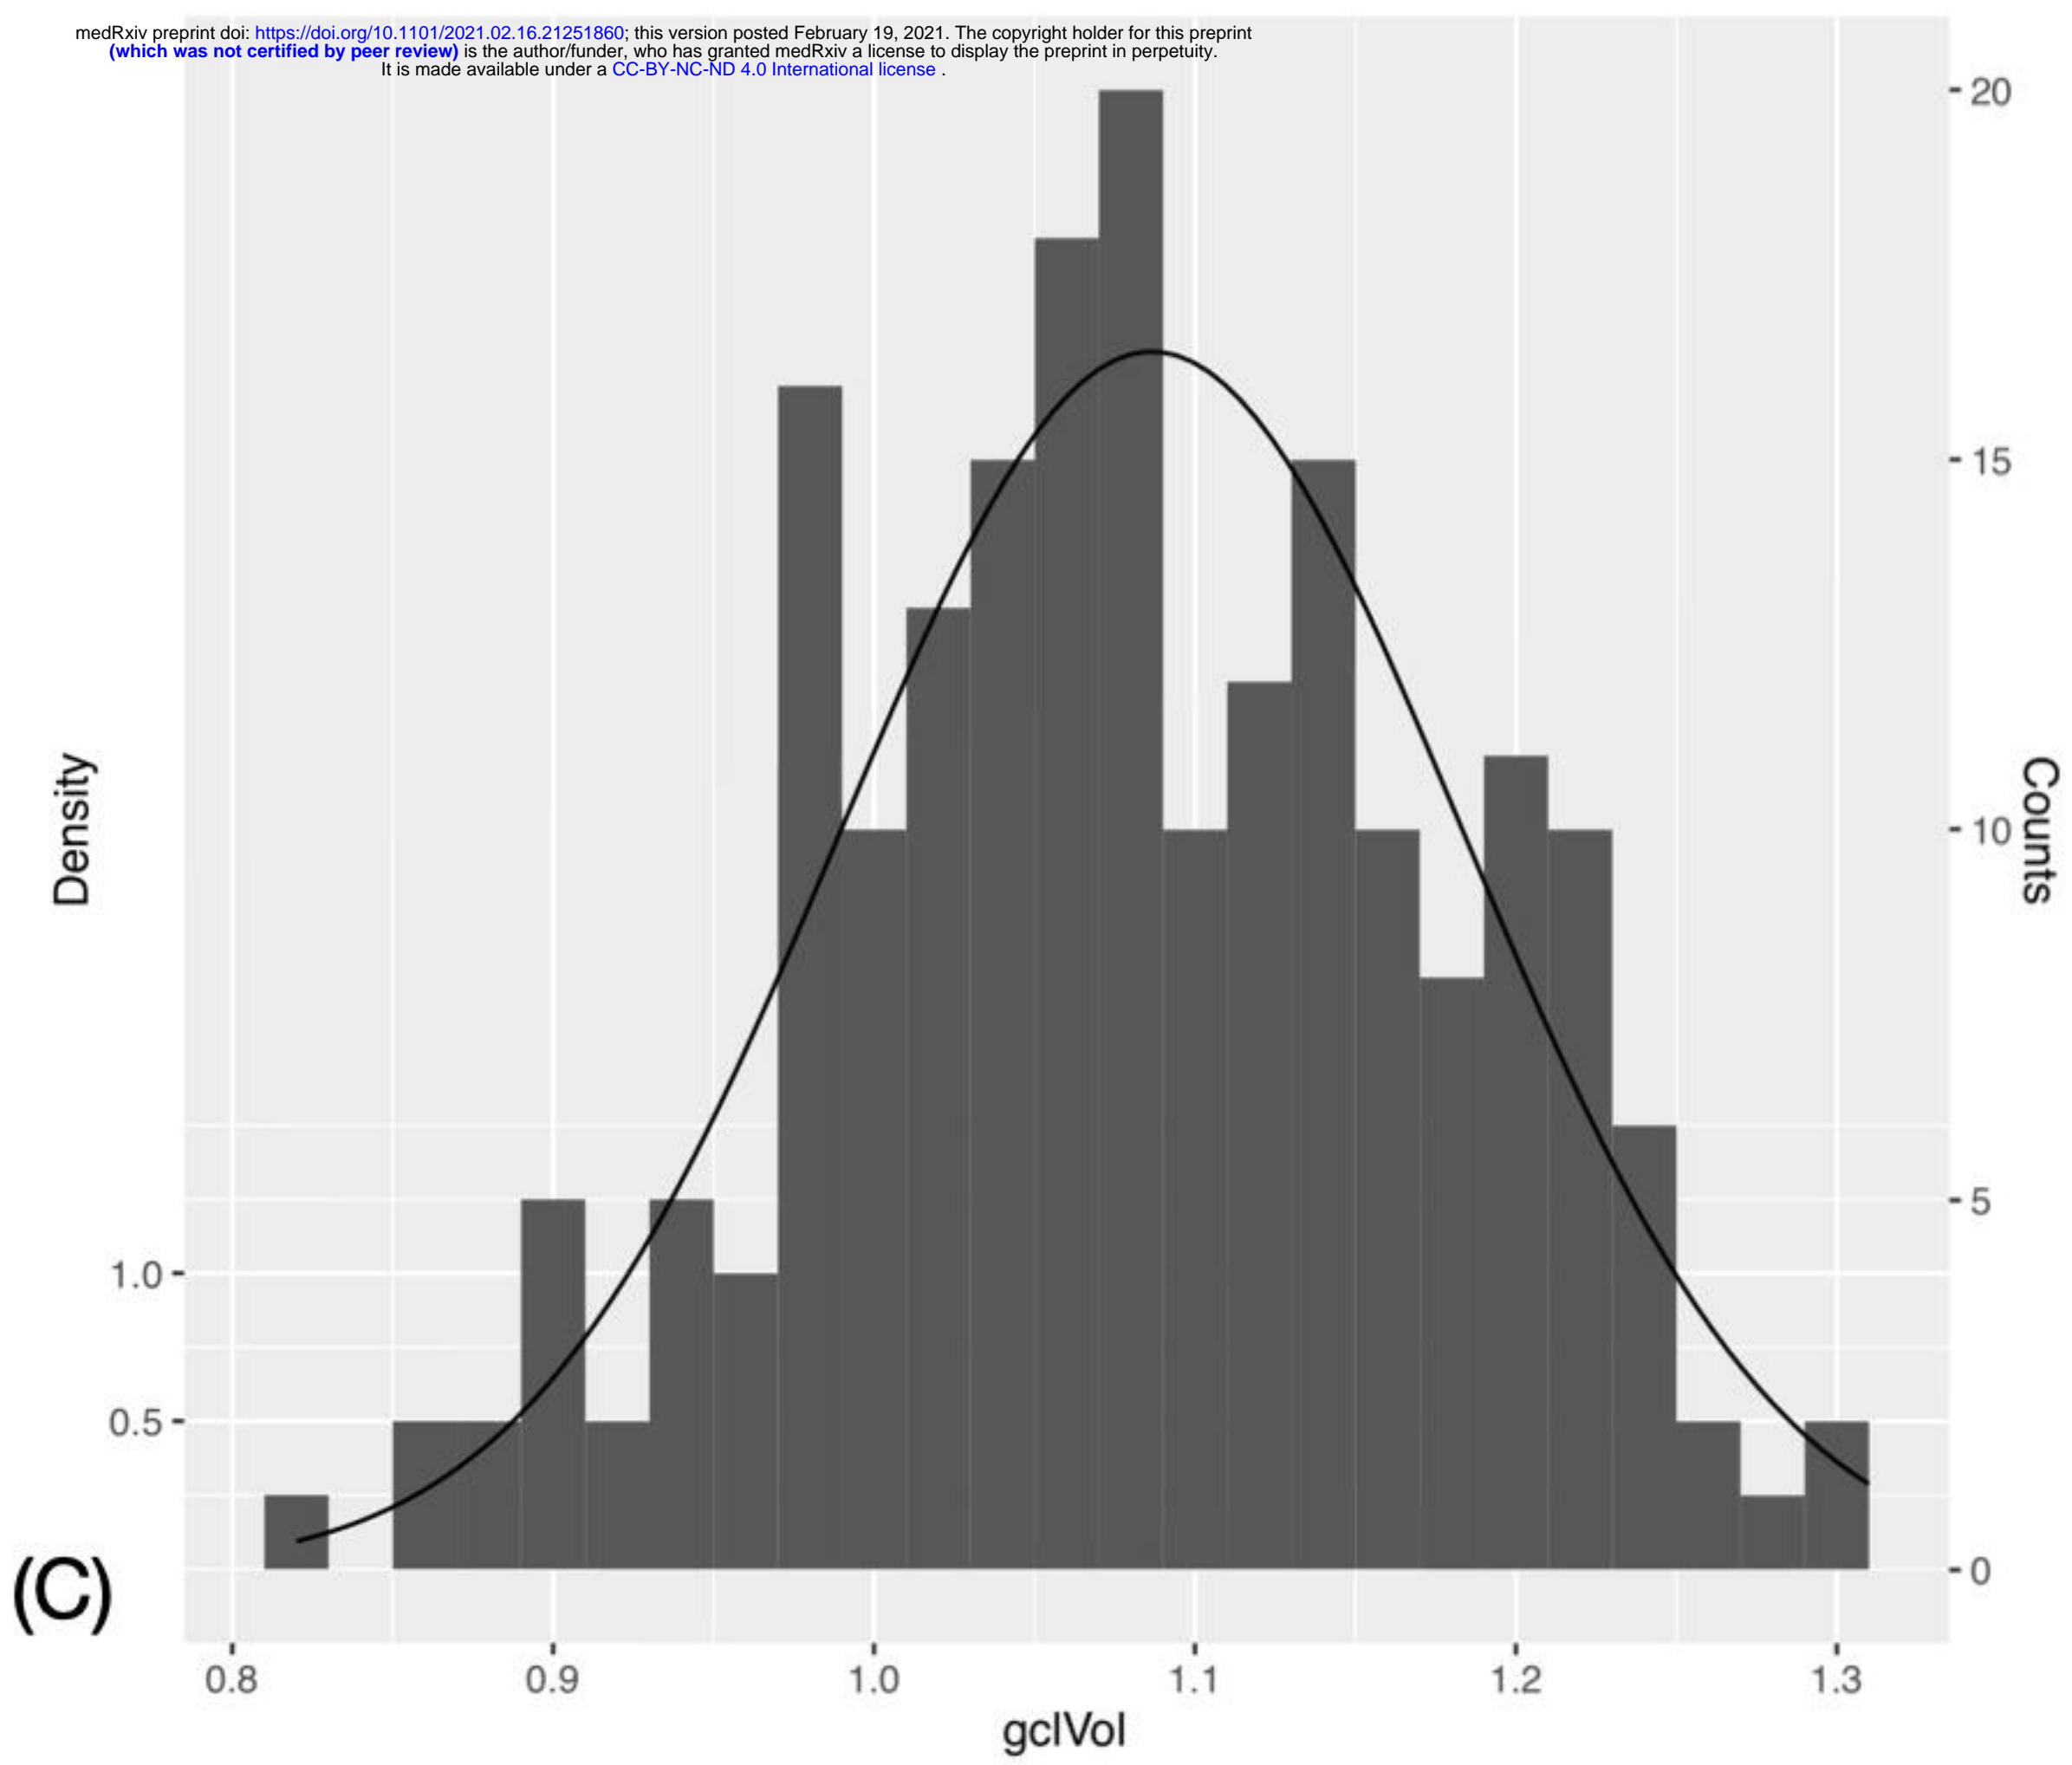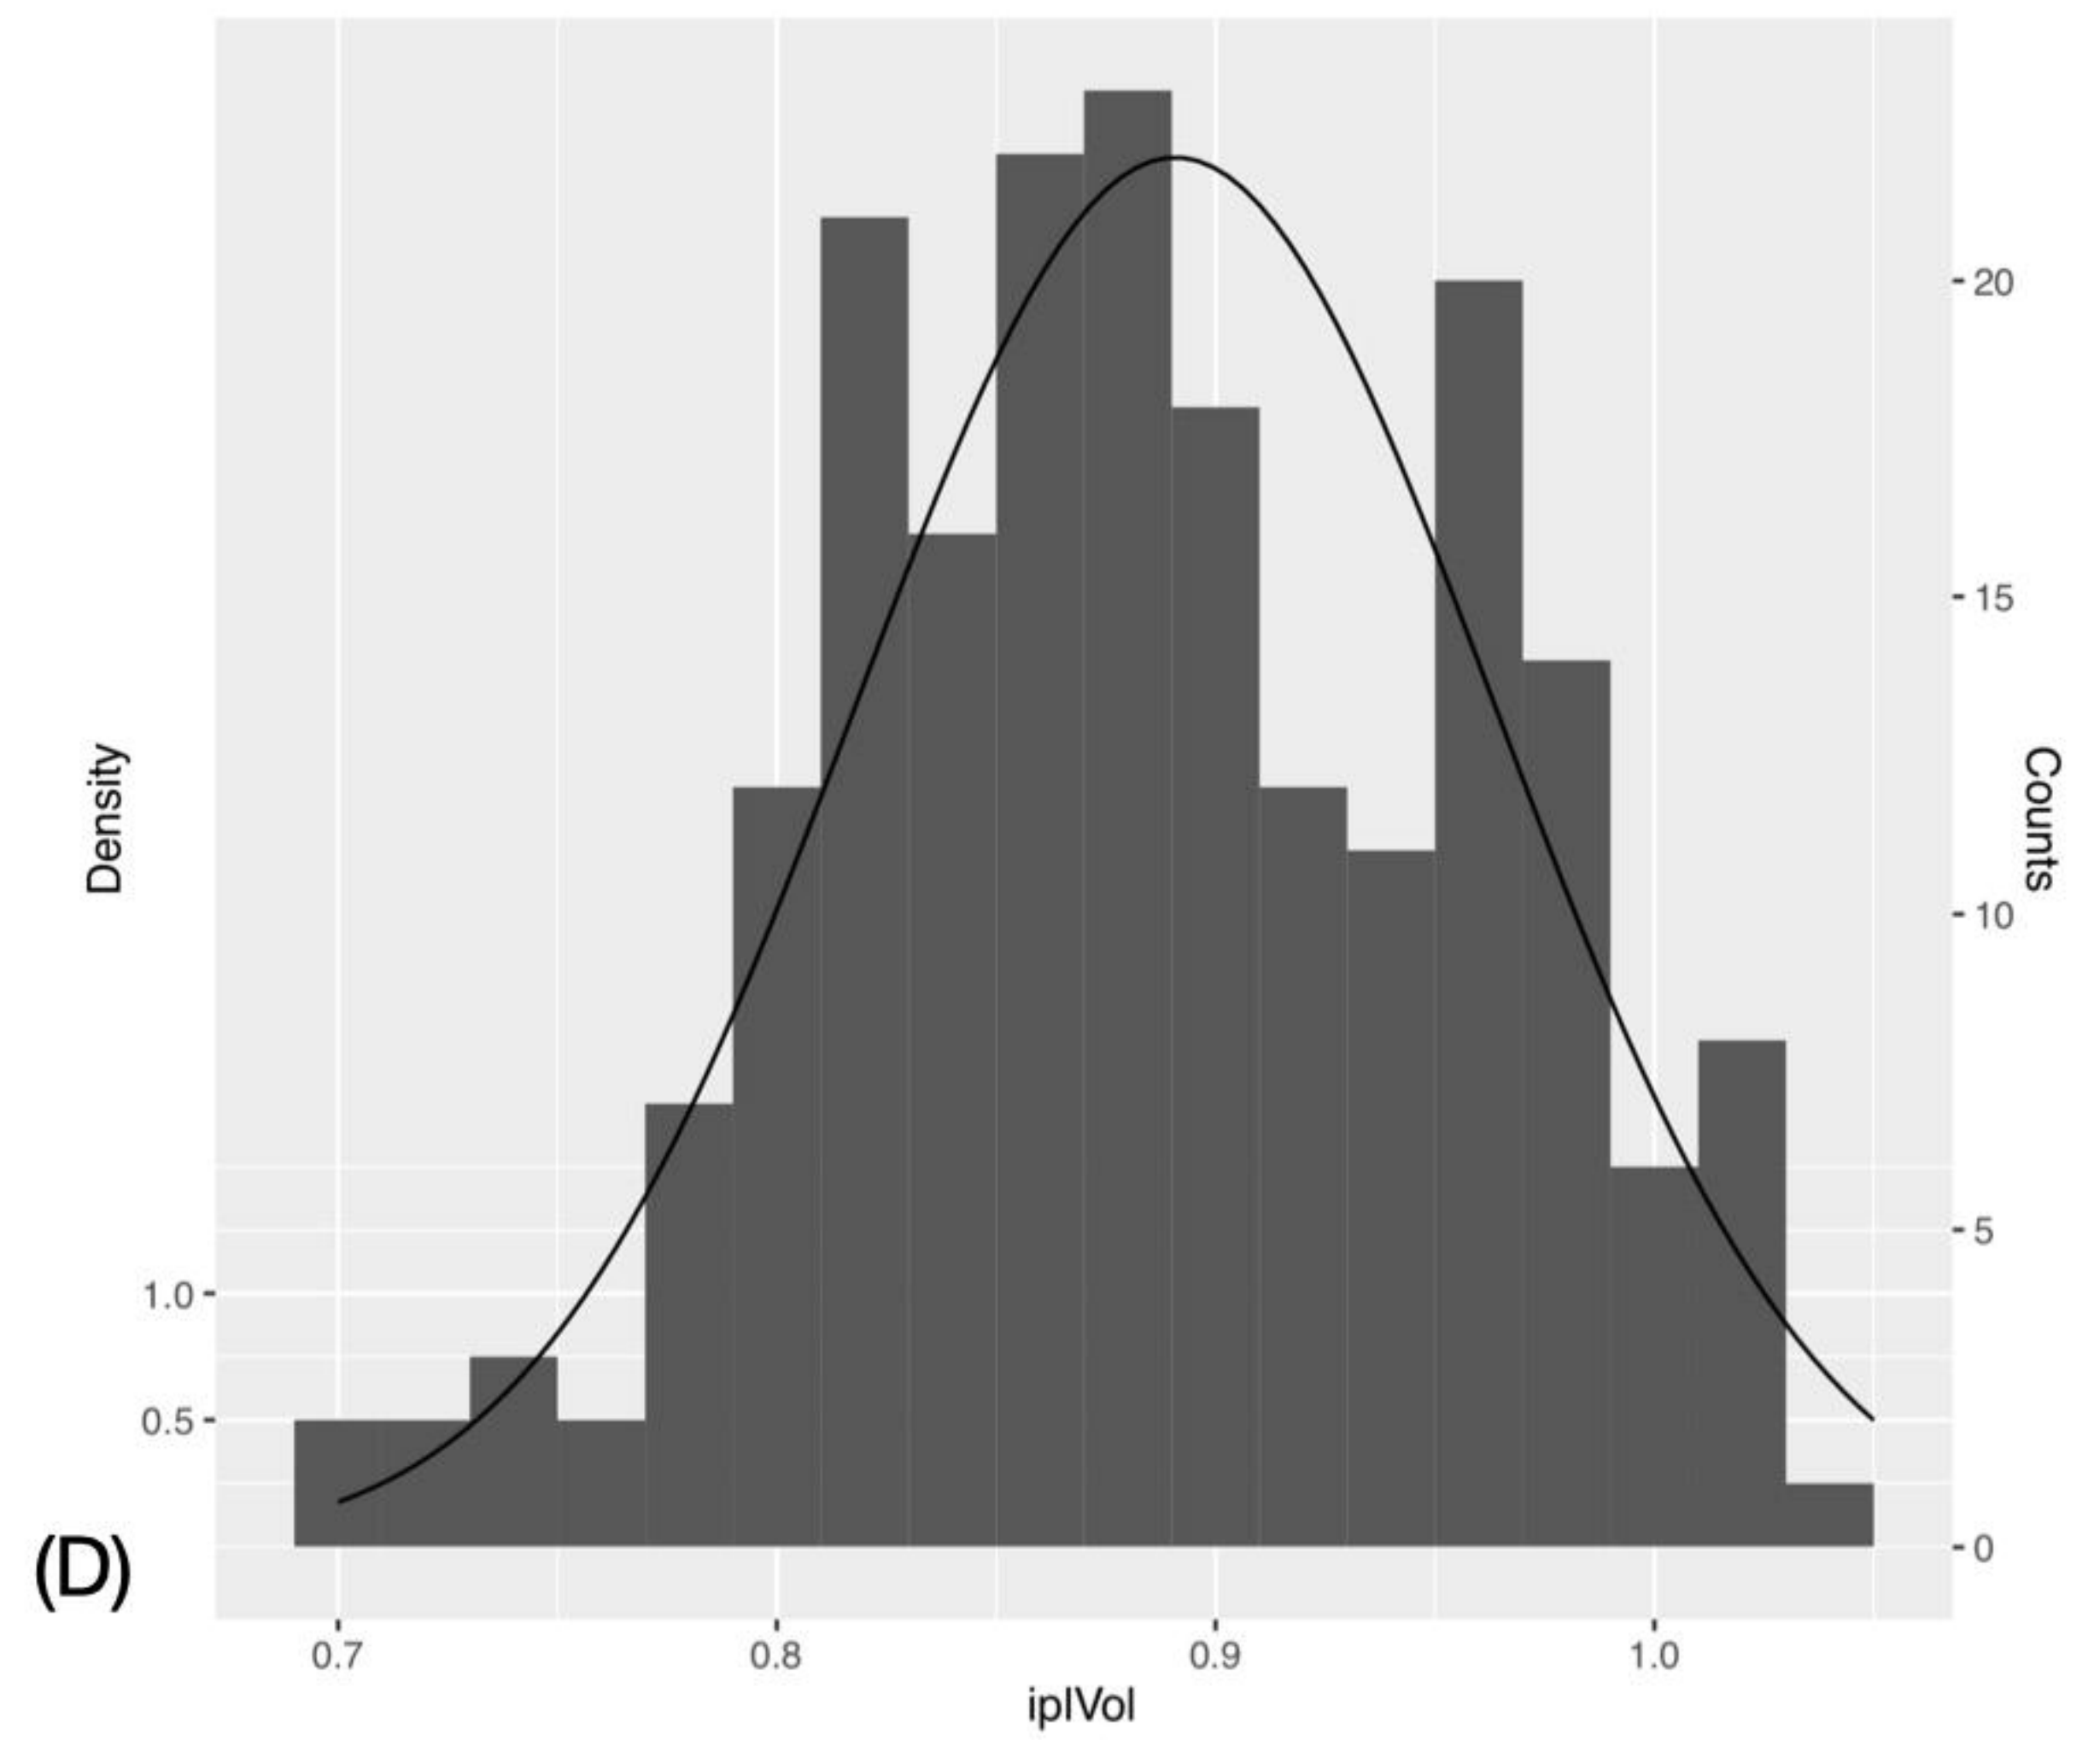

Density

Counts

medRxiv preprint doi: <https://doi.org/10.1101/2021.02.16.21251860>; this version posted February 19, 2021. The copyright holder for this preprint (which was not certified by peer review) is the author/funder, who has granted medRxiv a license to display the preprint in perpetuity. It is made available under a [CC-BY-NC-ND 4.0 International license](https://creativecommons.org/licenses/by-nc-nd/4.0/).

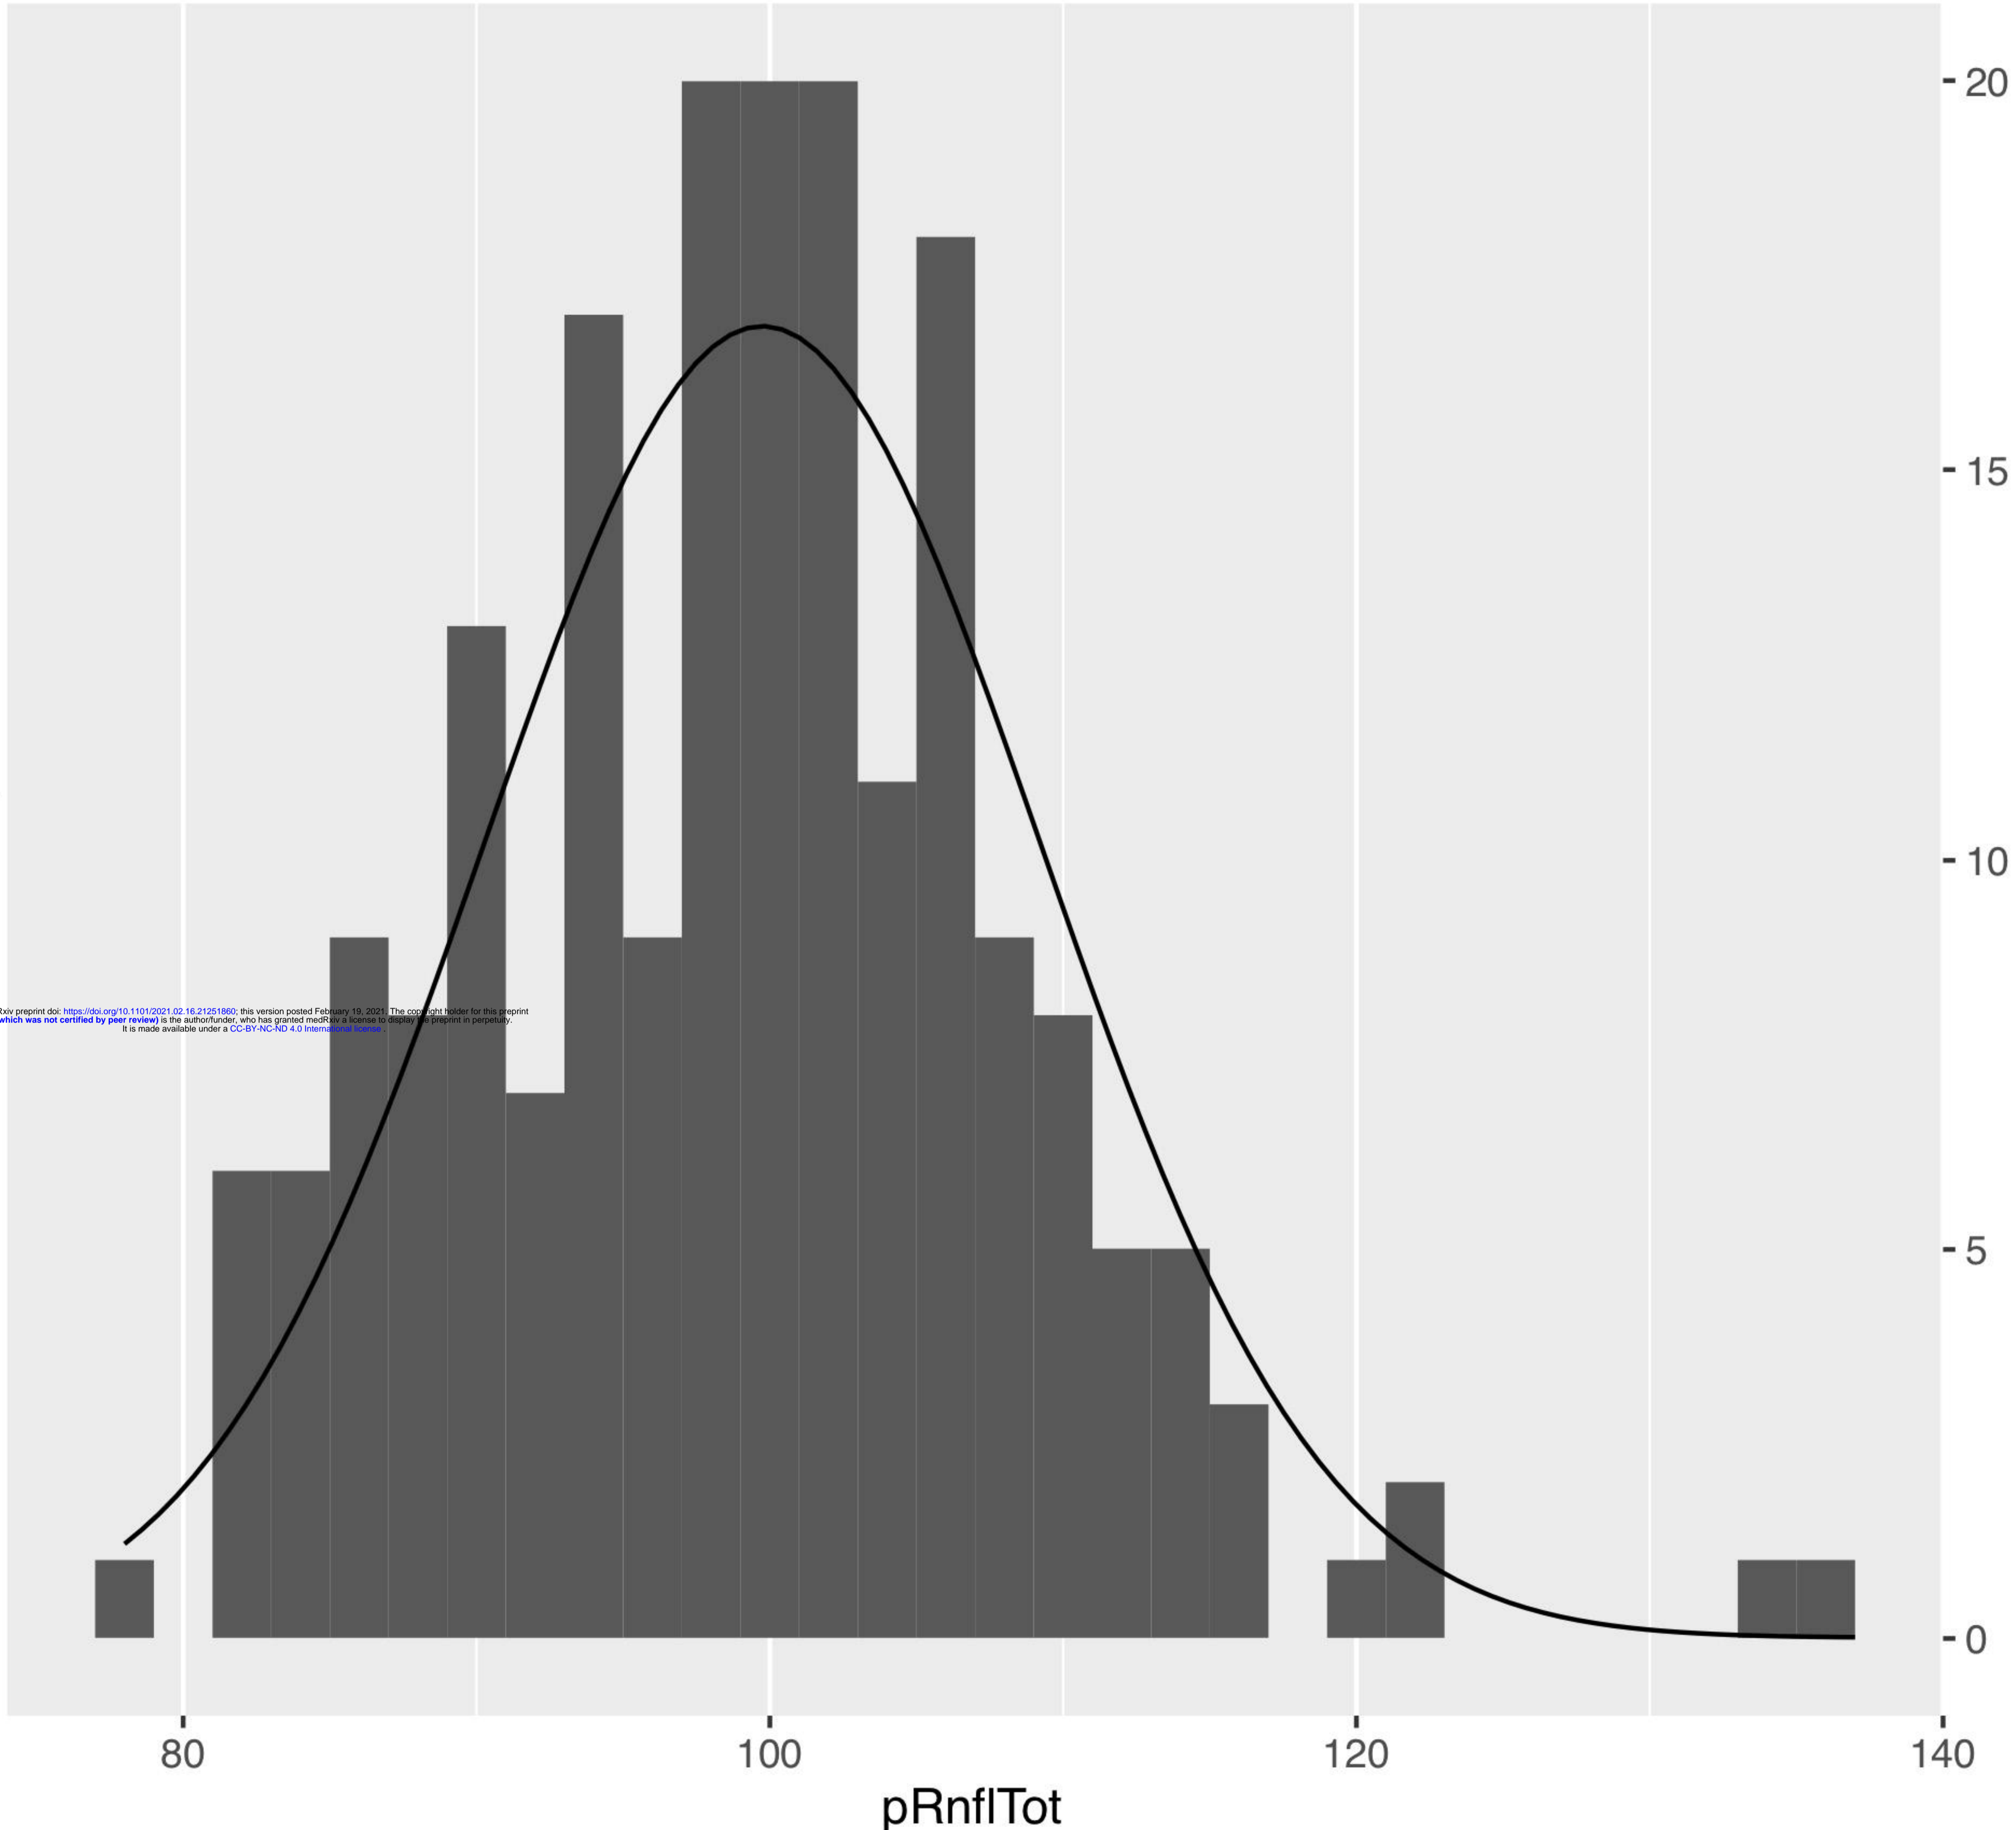

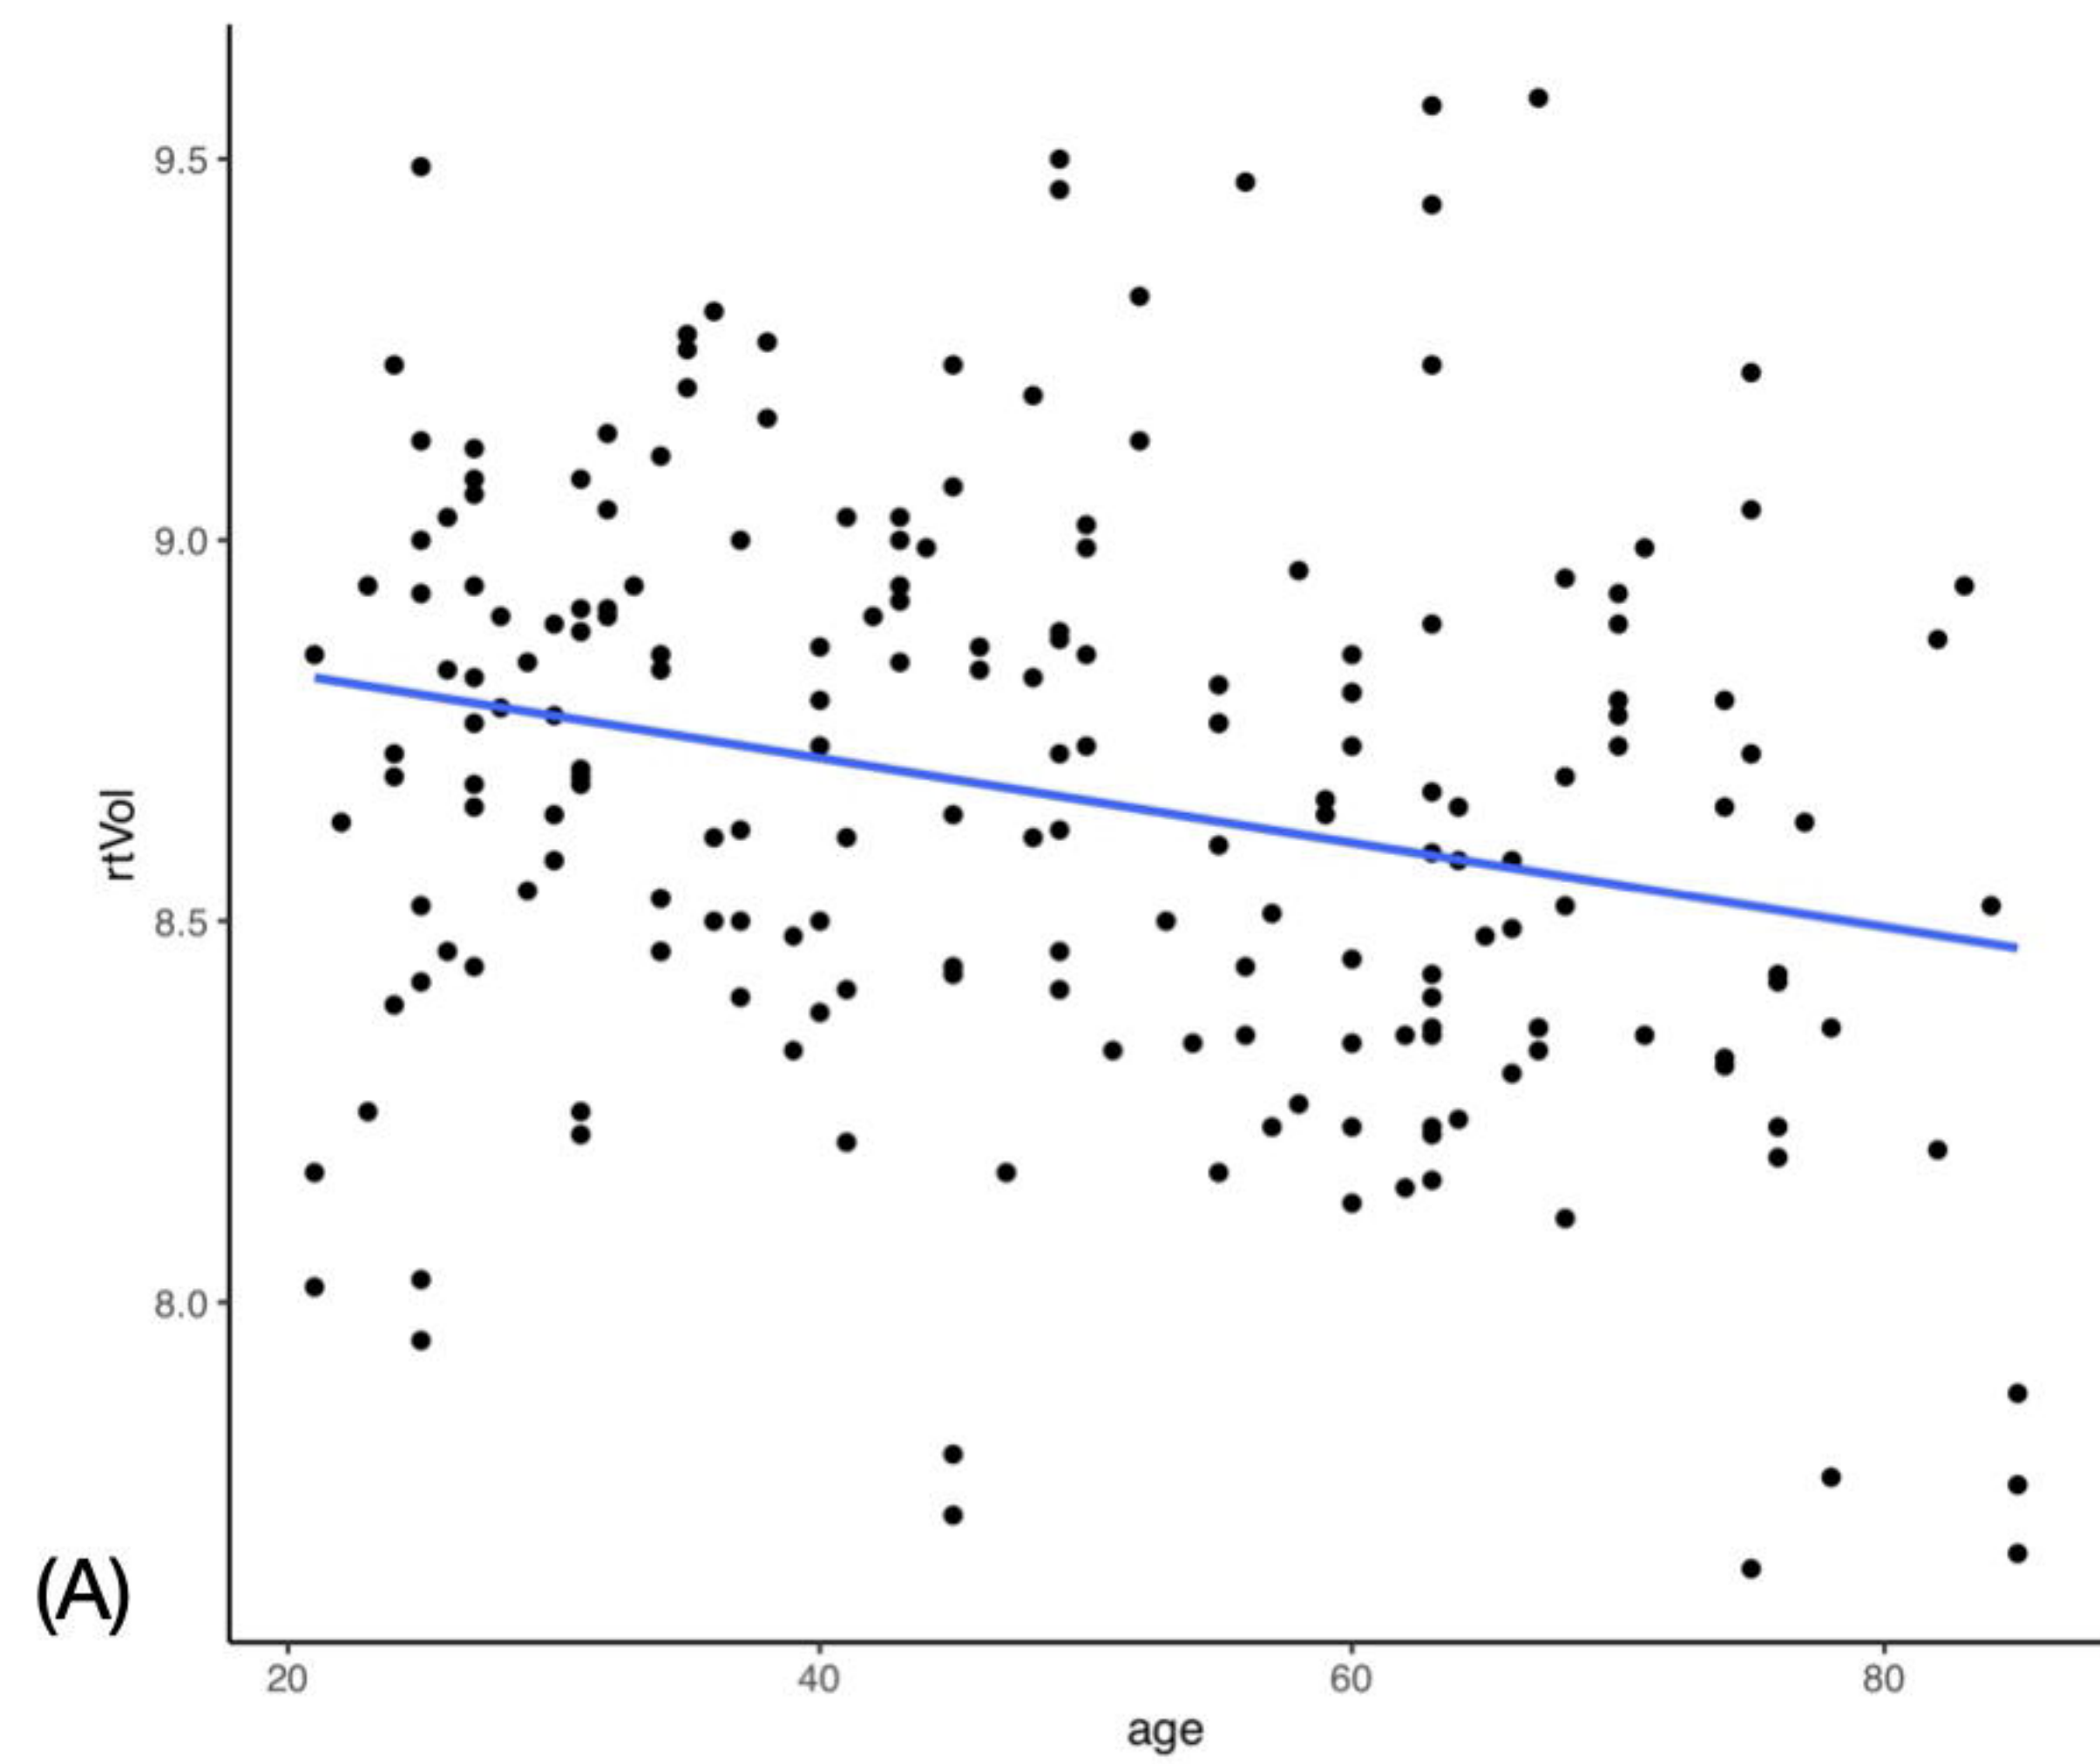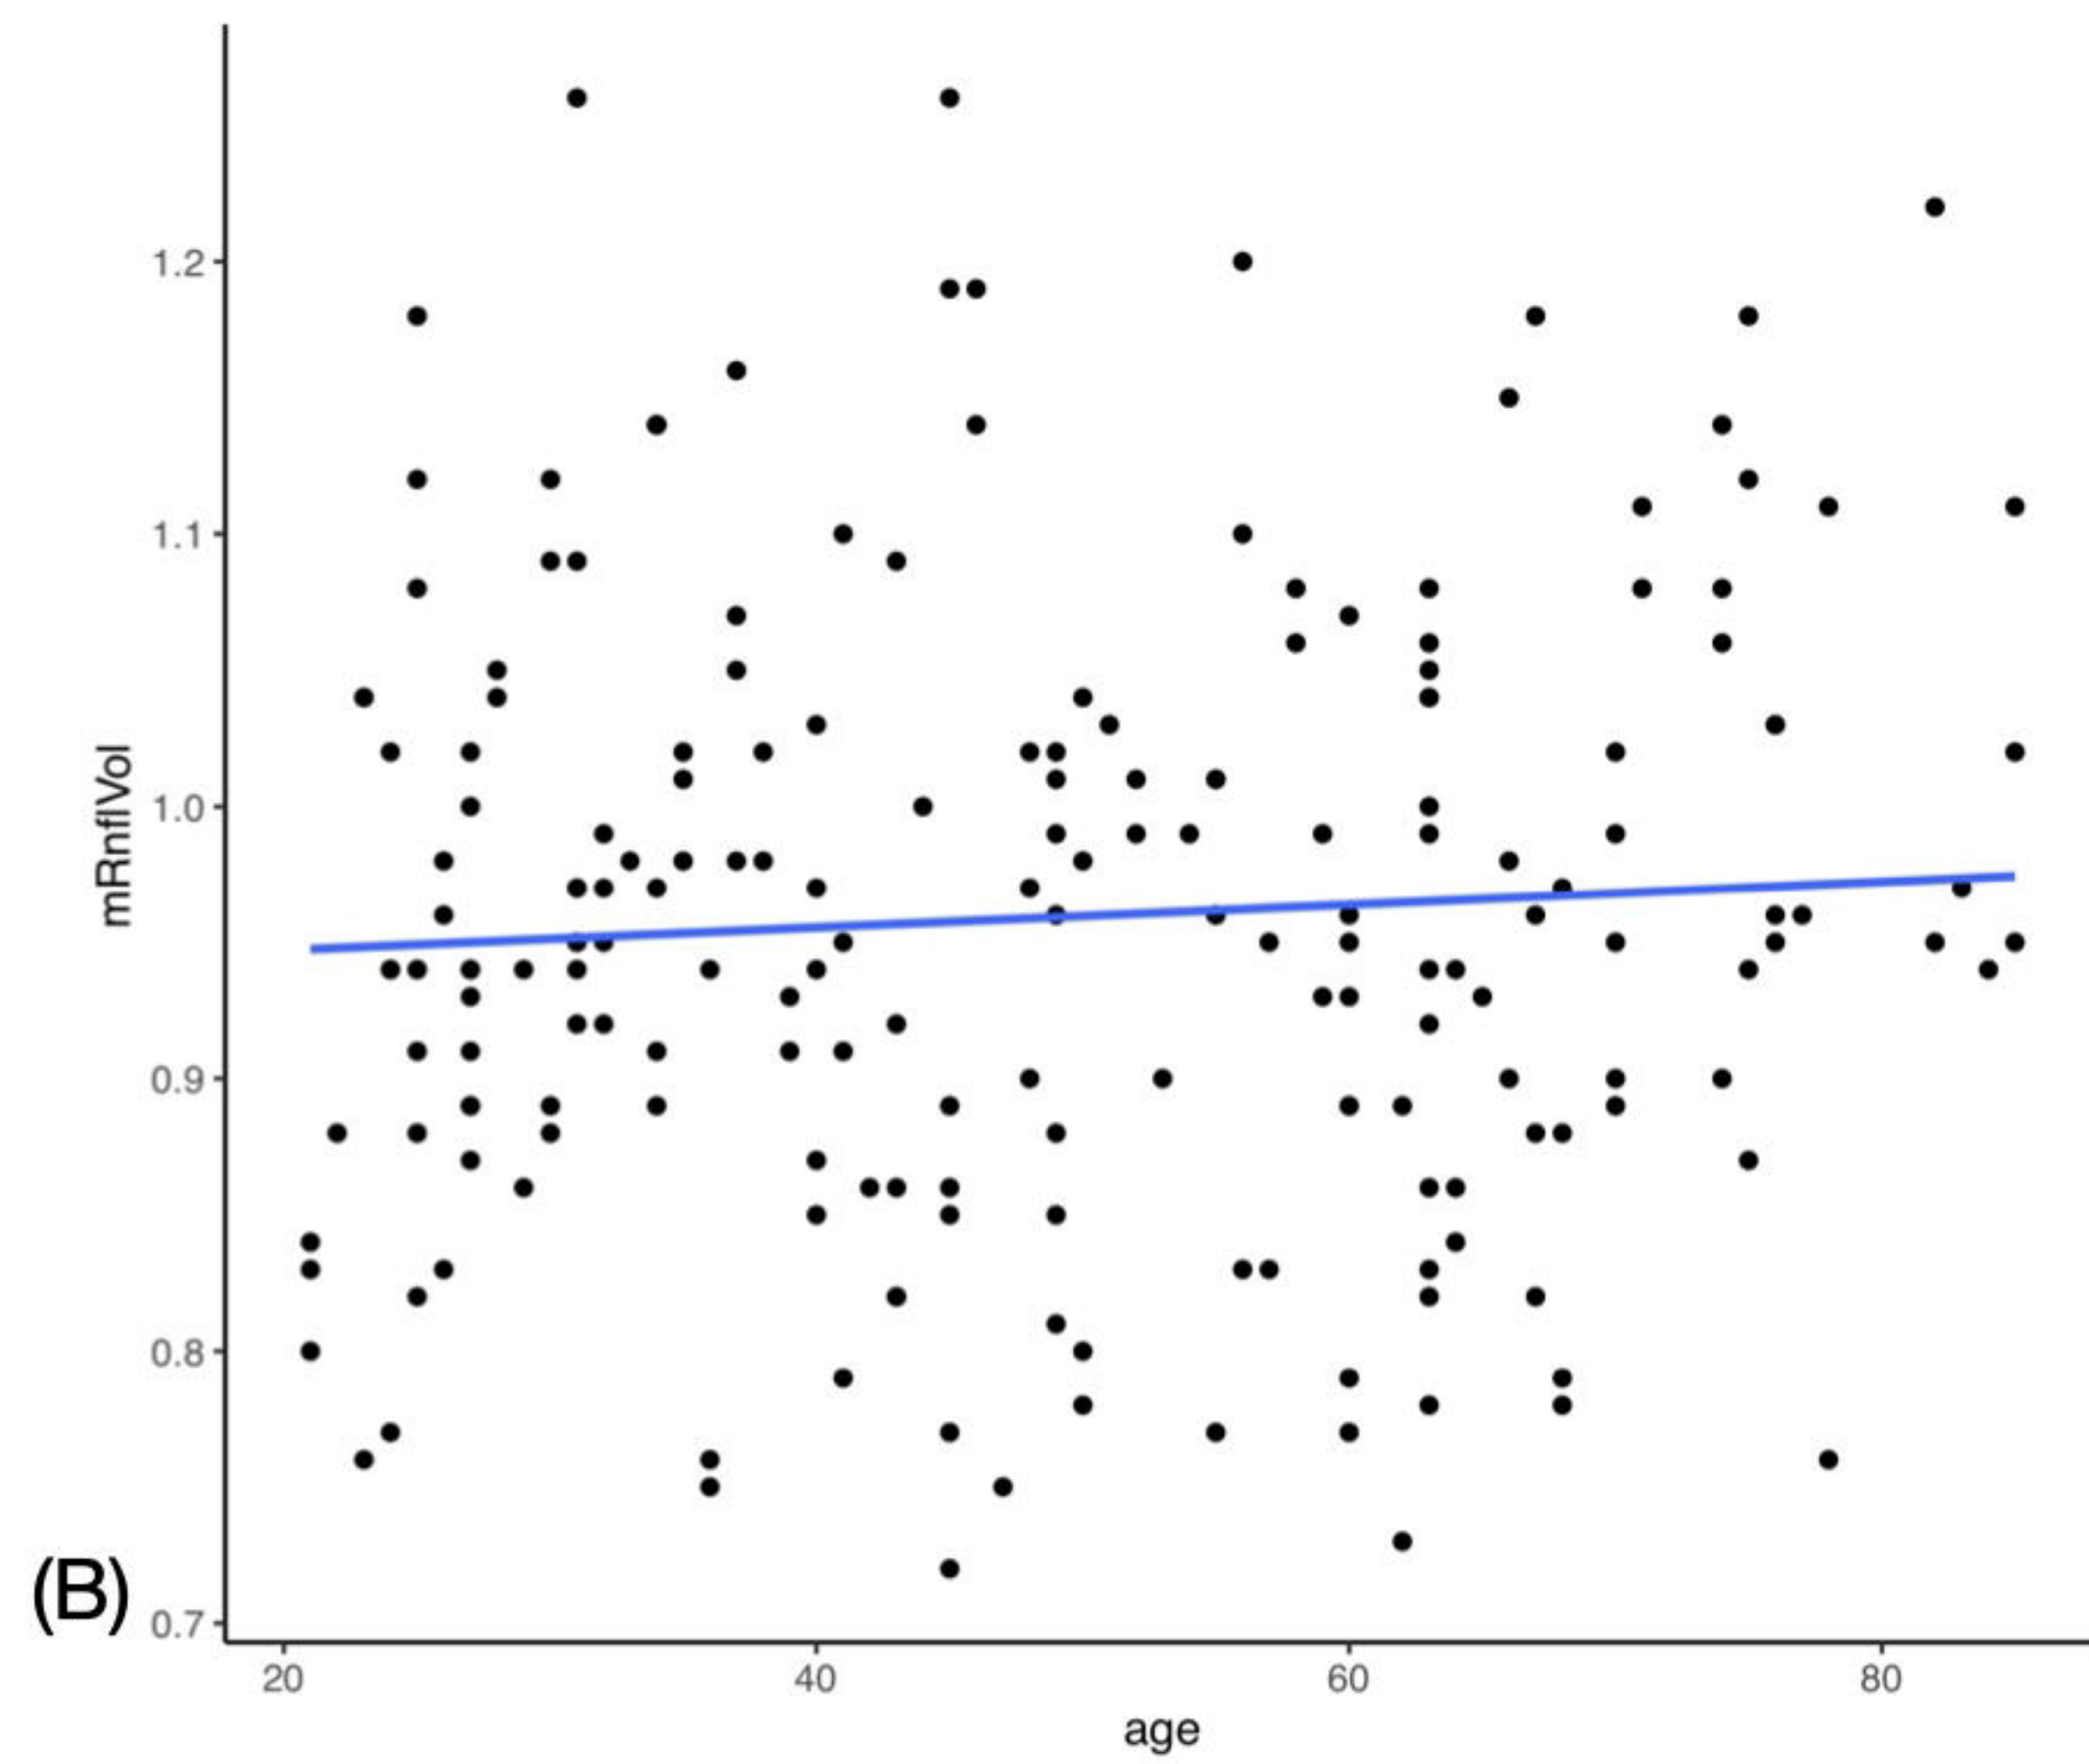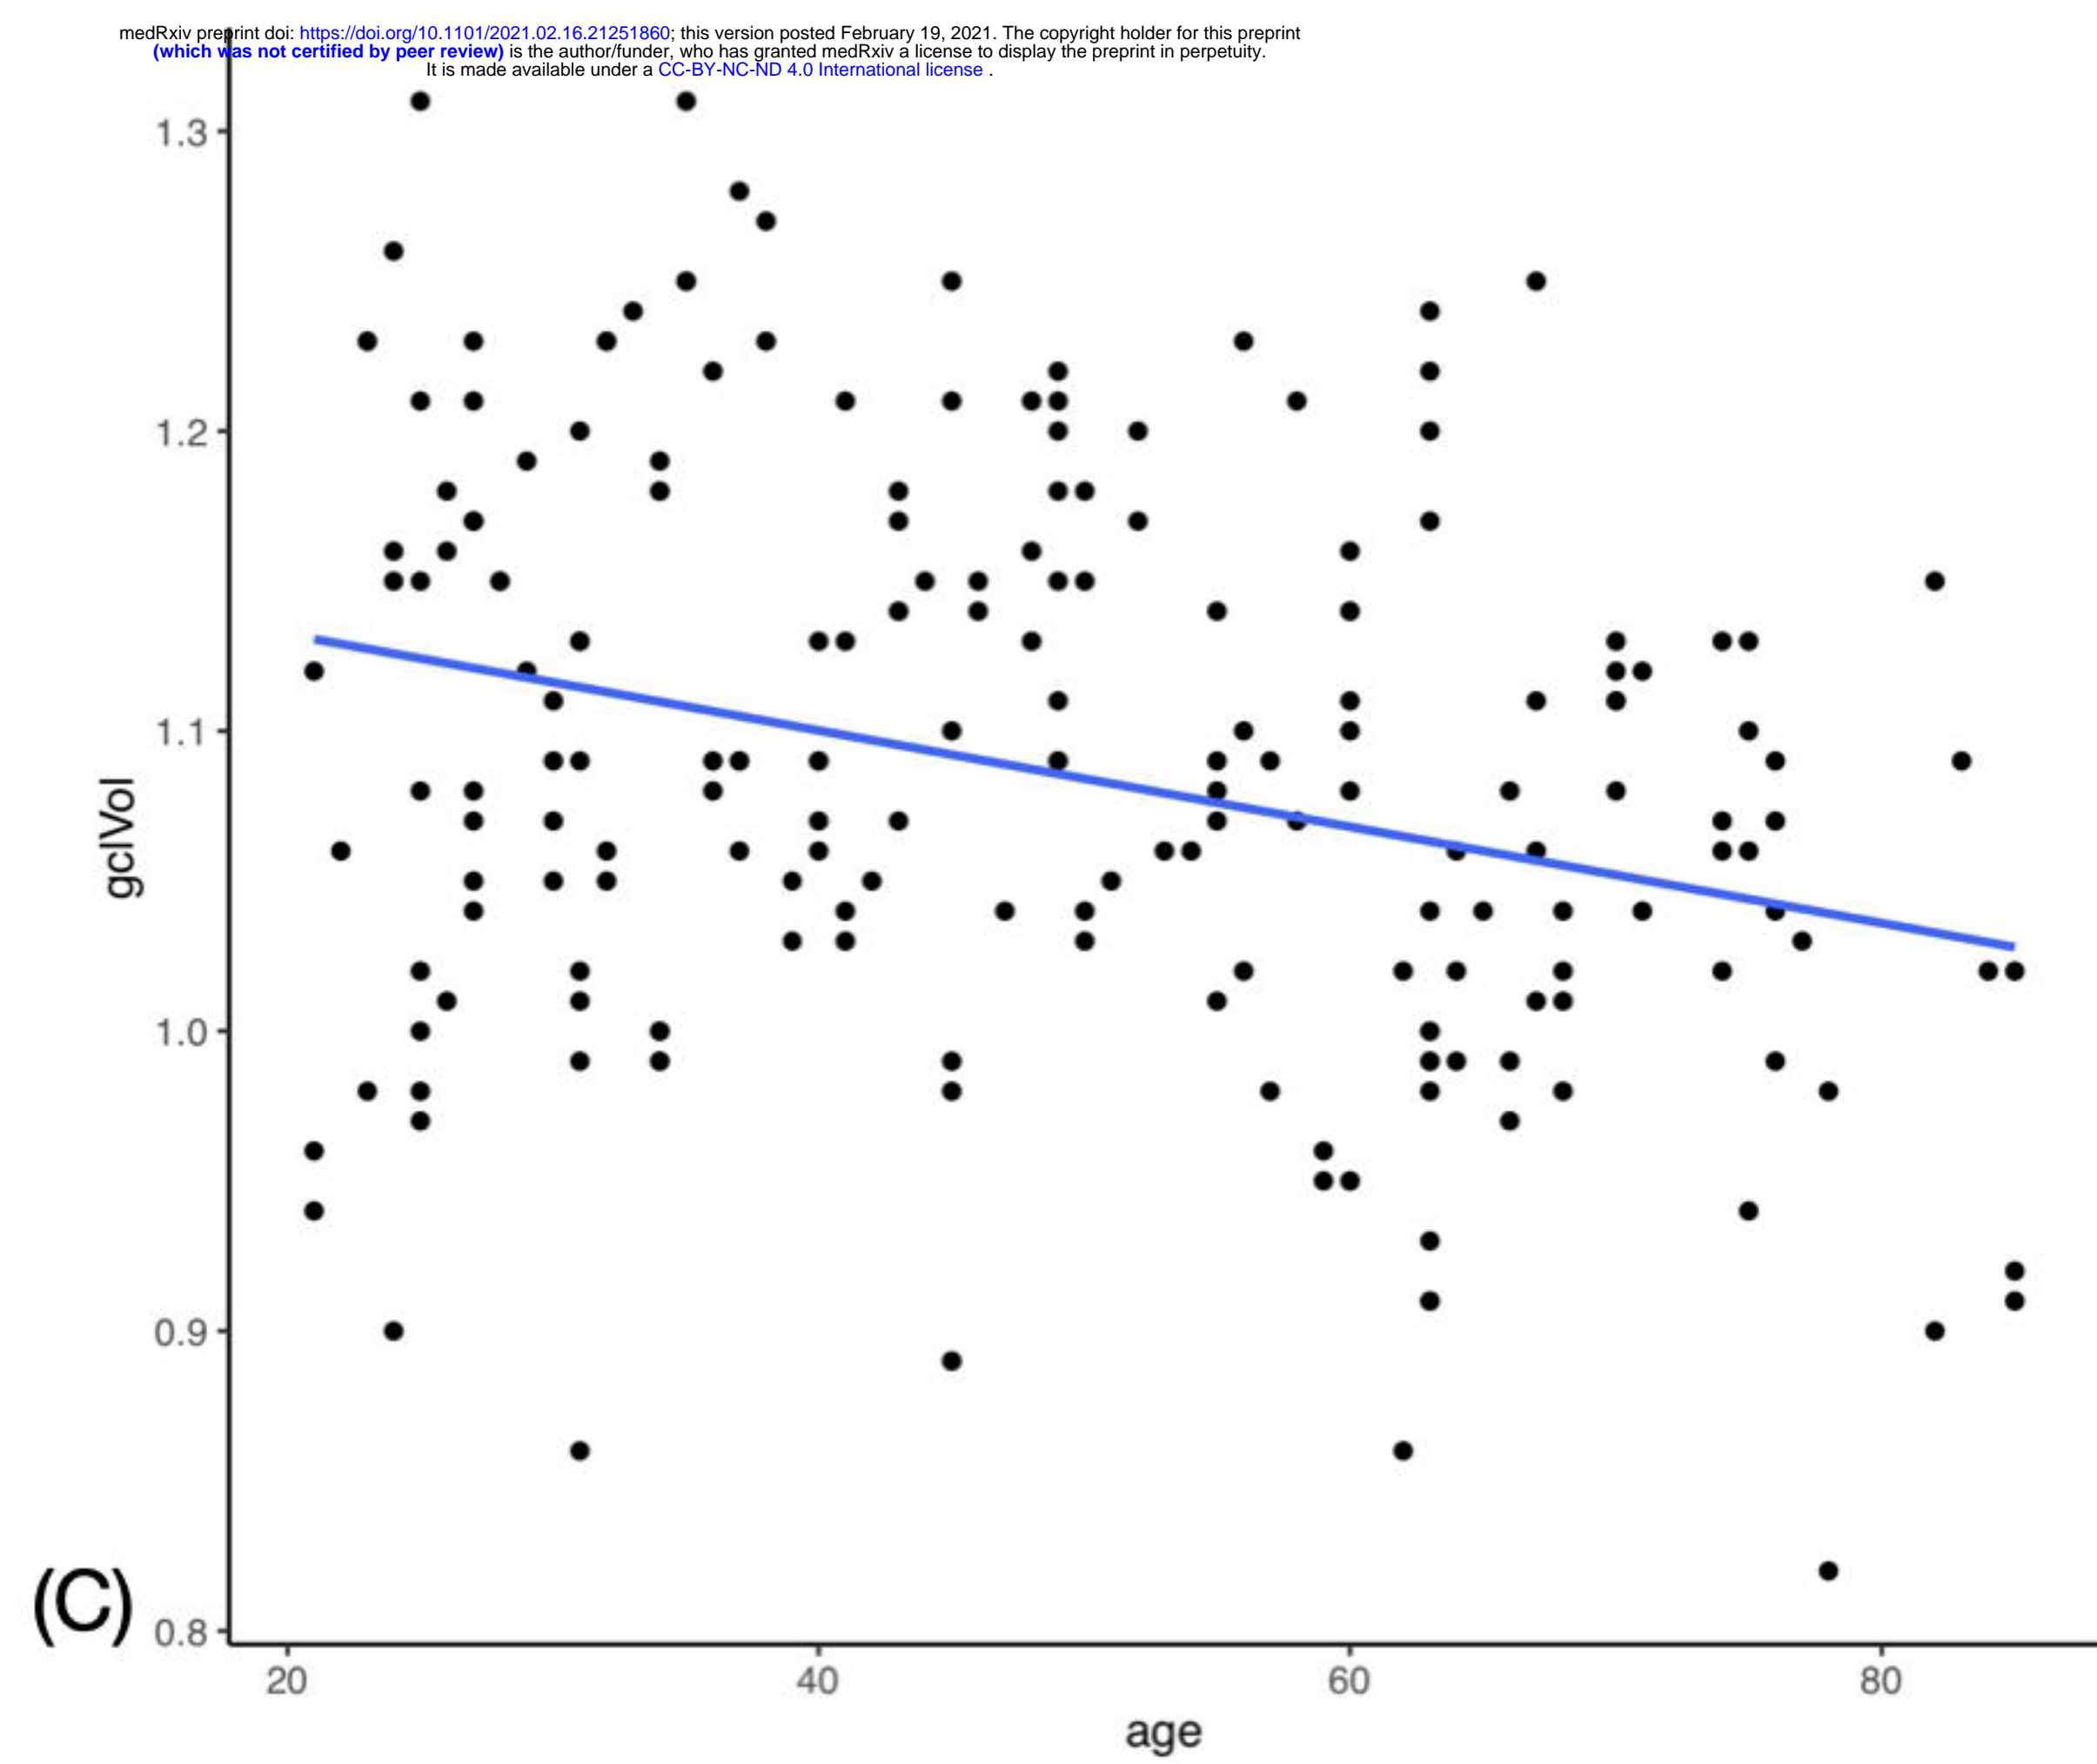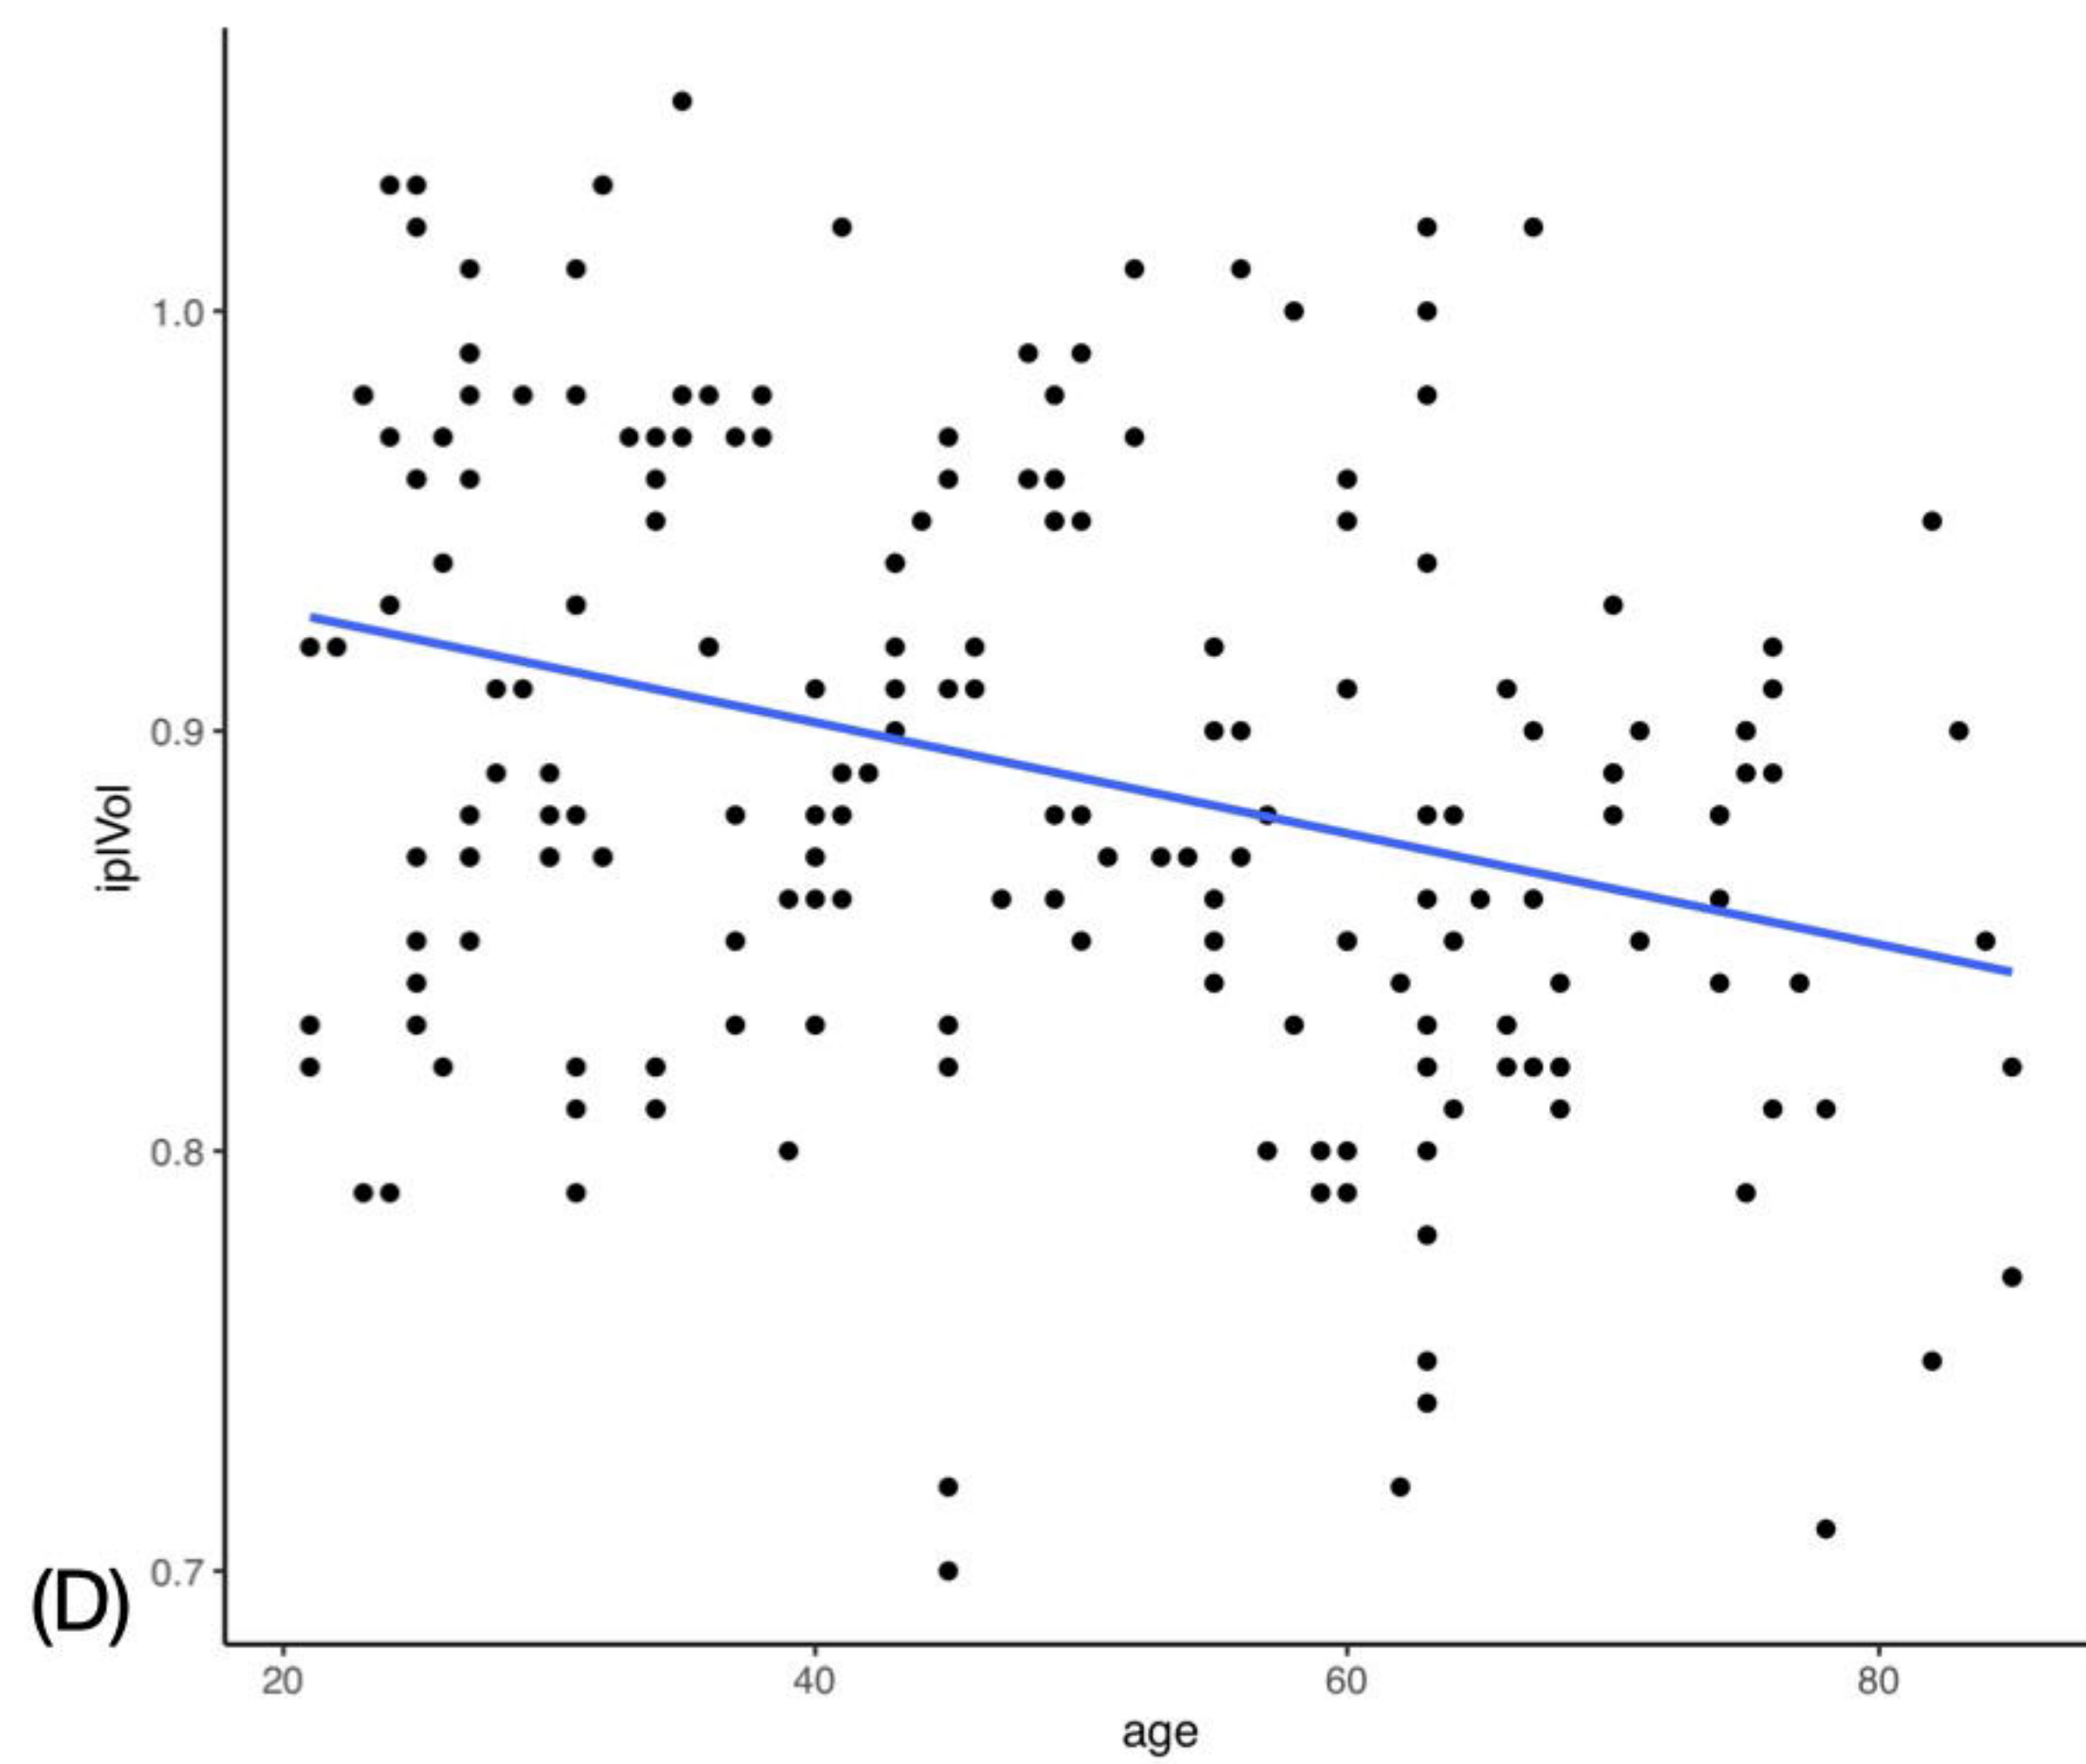

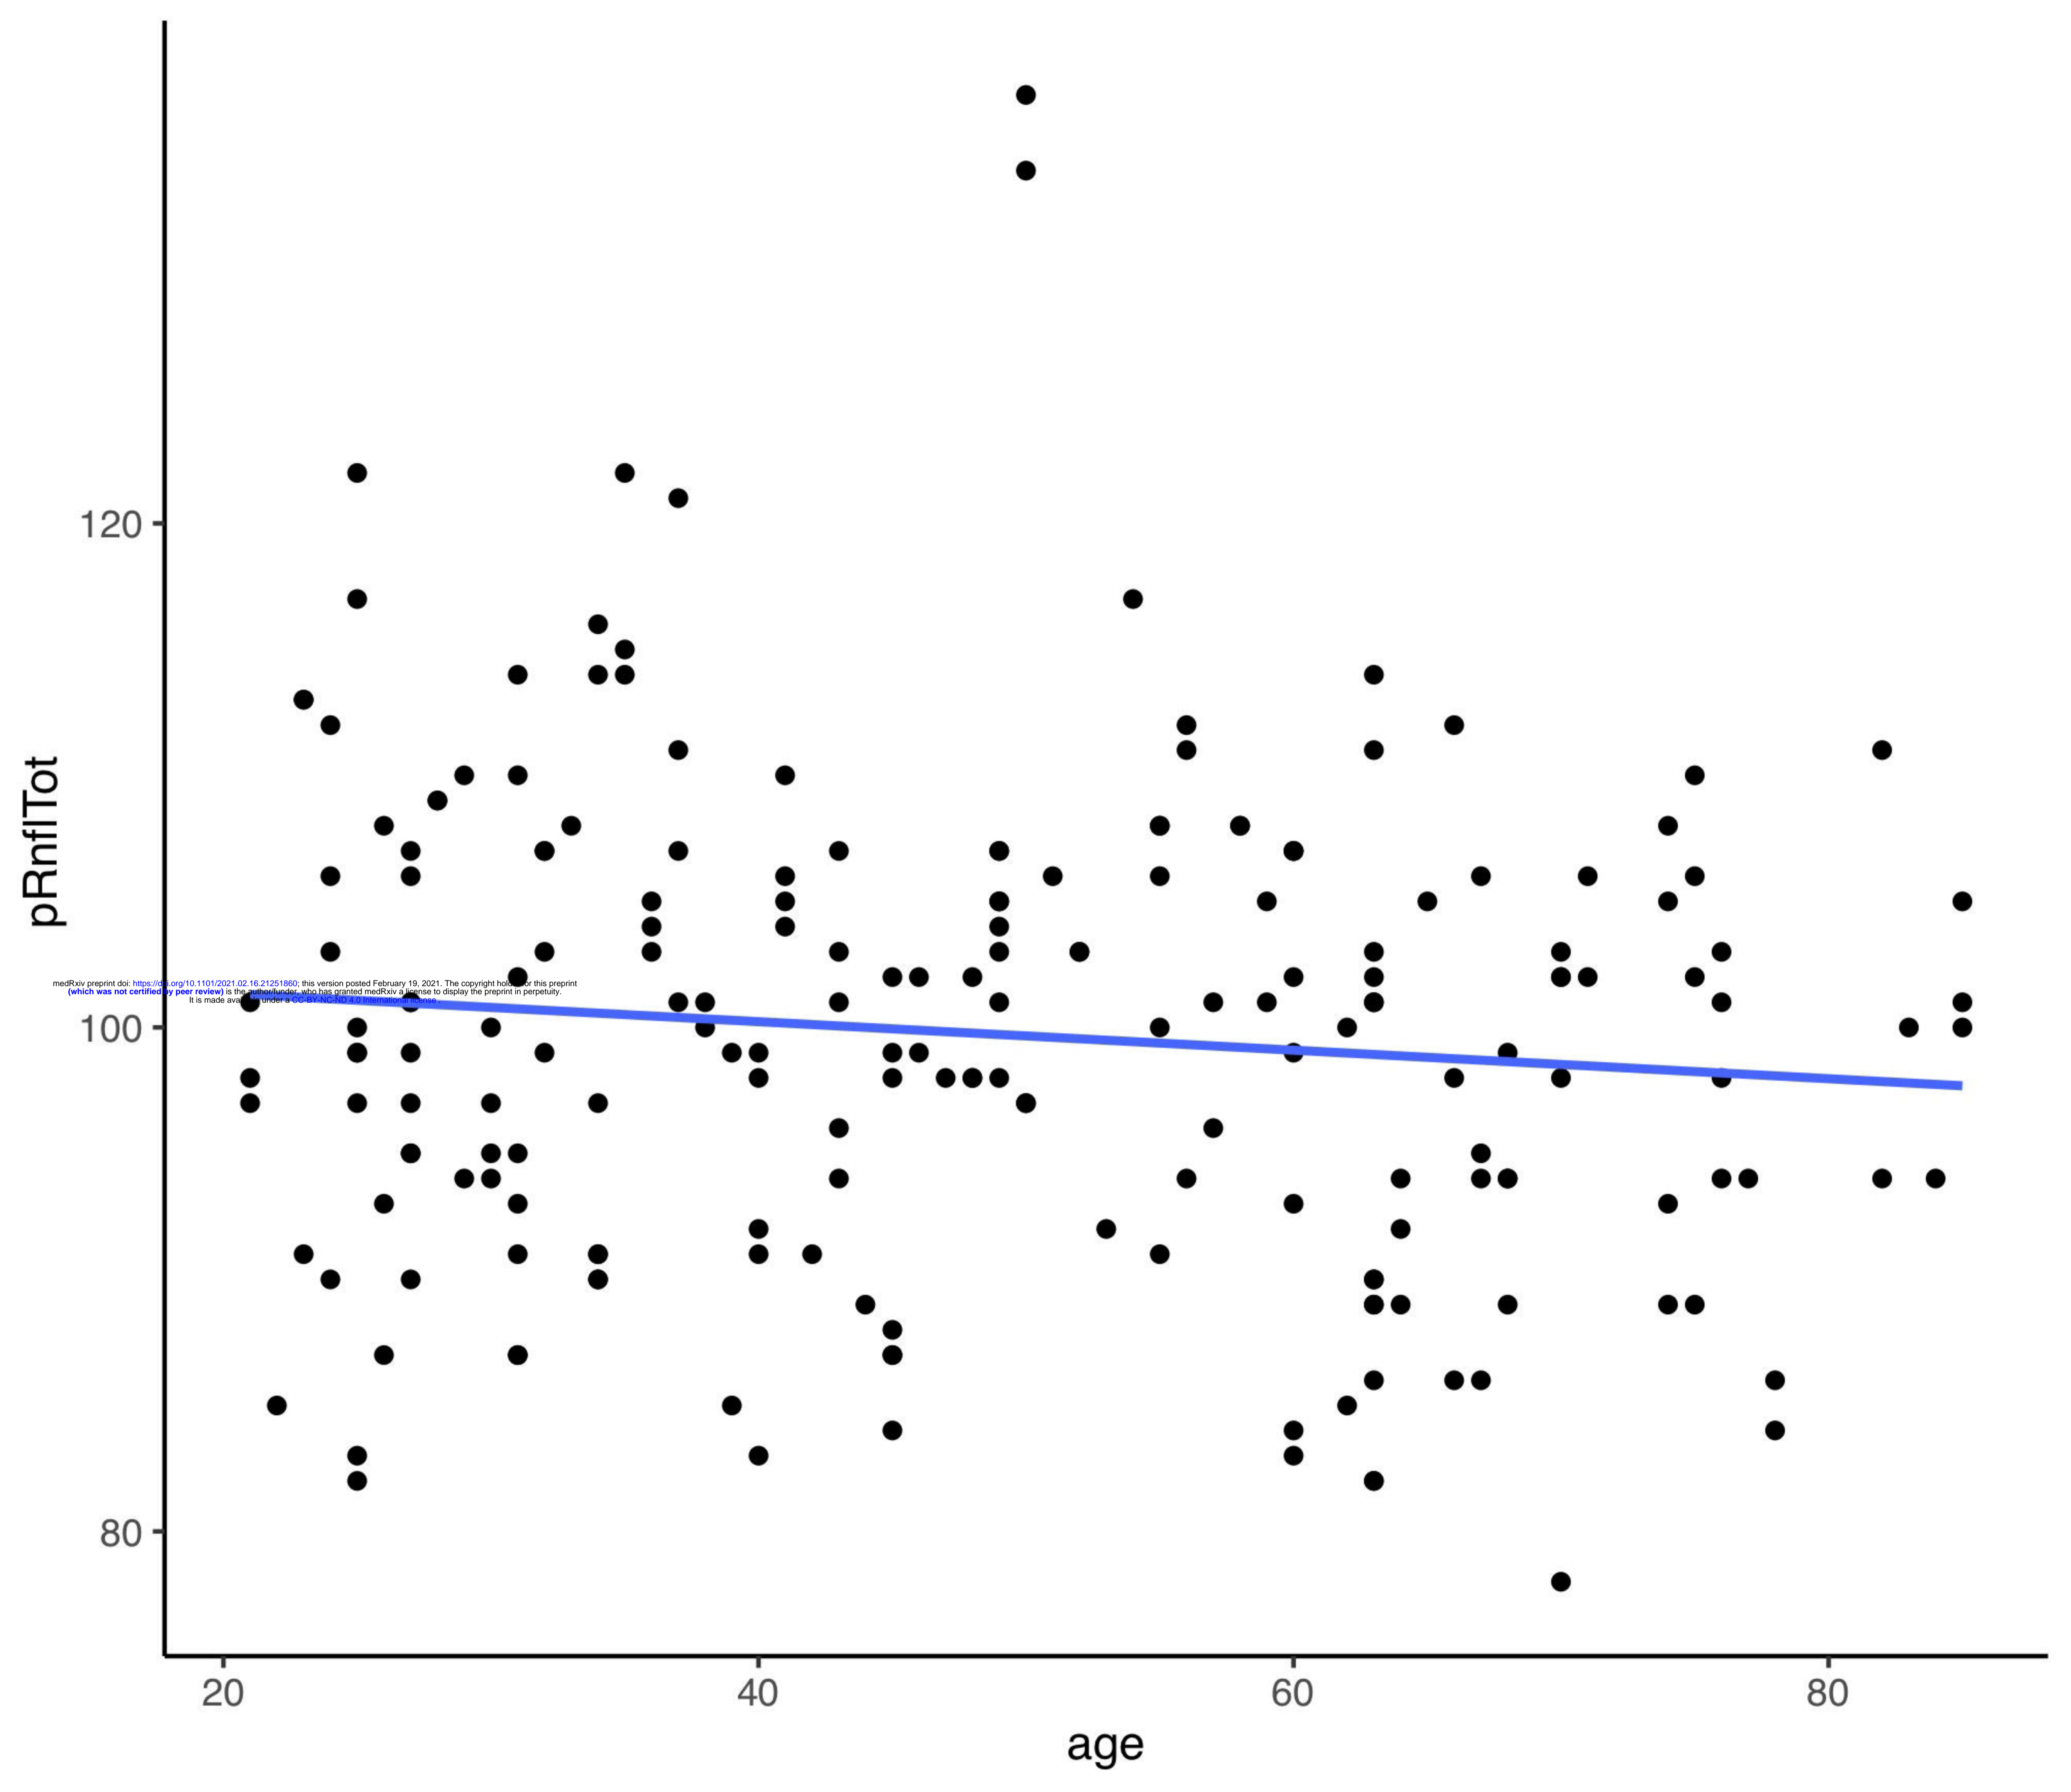

Source: https://medrxiv.org/content/10.1101/2021.02.16.21251860v1.full.pdf
